# Supplementary material for: AcetoBase Version 2: a database update and re-analysis of formyltetrahydrofolate synthetase amplicon sequencing data from anaerobic digesters
Source: Oxford University Press journal article supplement (doi:10.1093/database/baac041), 2022-01-01
Supplement: baac041_supp.zip [file baac041_supp.zip]

## Supplementary Figures: S3A-F

### **AcetoBase Version 2: A database update and re-analysis of formyltetrahydrofolate synthetase amplicon sequencing data from anaerobic digesters**

Abhijeet Singh<sup>1\*</sup>, Anna Schnürer<sup>1\*</sup>

<sup>1</sup>Anaerobic Microbiology and Biotechnology Group, Department of Molecular Sciences, Swedish University of Agricultural Sciences, Almas Allé 5, Uppsala, SE-750 07, Uppsala, Sweden

\*For correspondence. E-mail: [anna.schnurer@slu.se](mailto:anna.schnurer@slu.se); [abhijeet.singh@slu.se](mailto:abhijeet.singh@slu.se), Tel. +46 18671000; Fax +46 18672000; Address: Department of Molecular Sciences, Box 7025, 75007 Uppsala, Sweden

#### **Description:**

The supplementary figures S3A-F (phylum-species level) are generated in present study by the reanalysis of the FTHFS amplicon sequence data from the study by Singh *et al.* (2021).

#### **Reference:**

Singh, A., Moestedt, J., Berg, A., and Schnürer, A. (2021). Microbiological Surveillance of Biogas Plants: Targeting Acetogenic Community. *Front. Microbiol.* 12, 2285. doi:10.3389/fmicb.2021.700256.

# S3A

FTHFS: Phylum level (> 0.25 %)

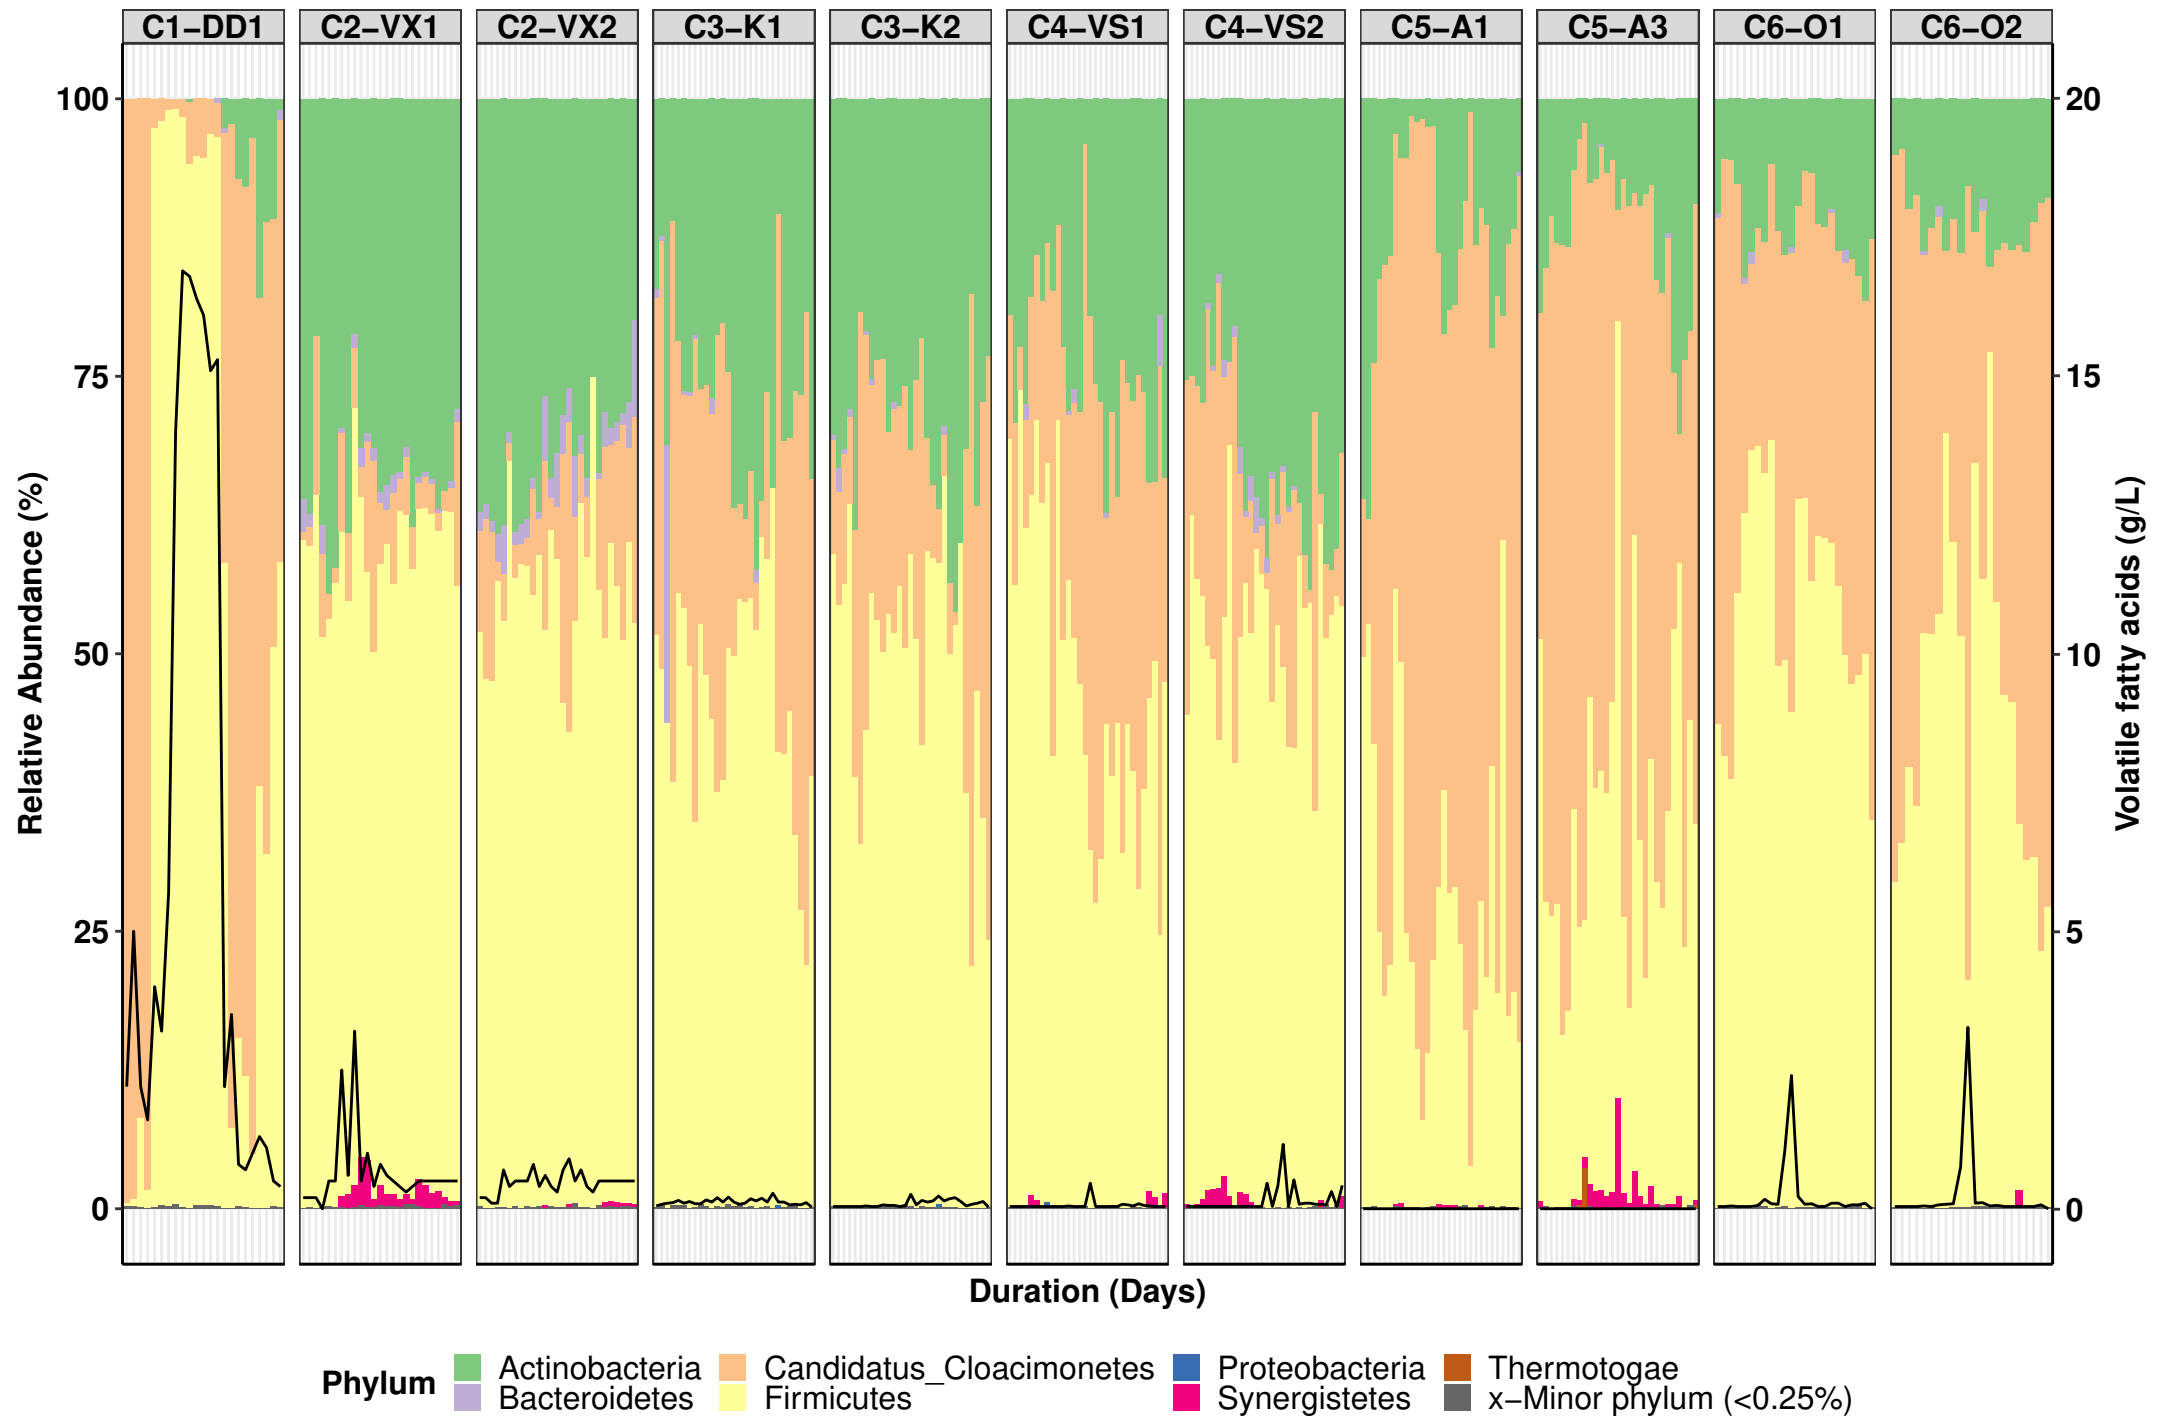

# S3B

FTHFS: Class level (> 0.25 %)

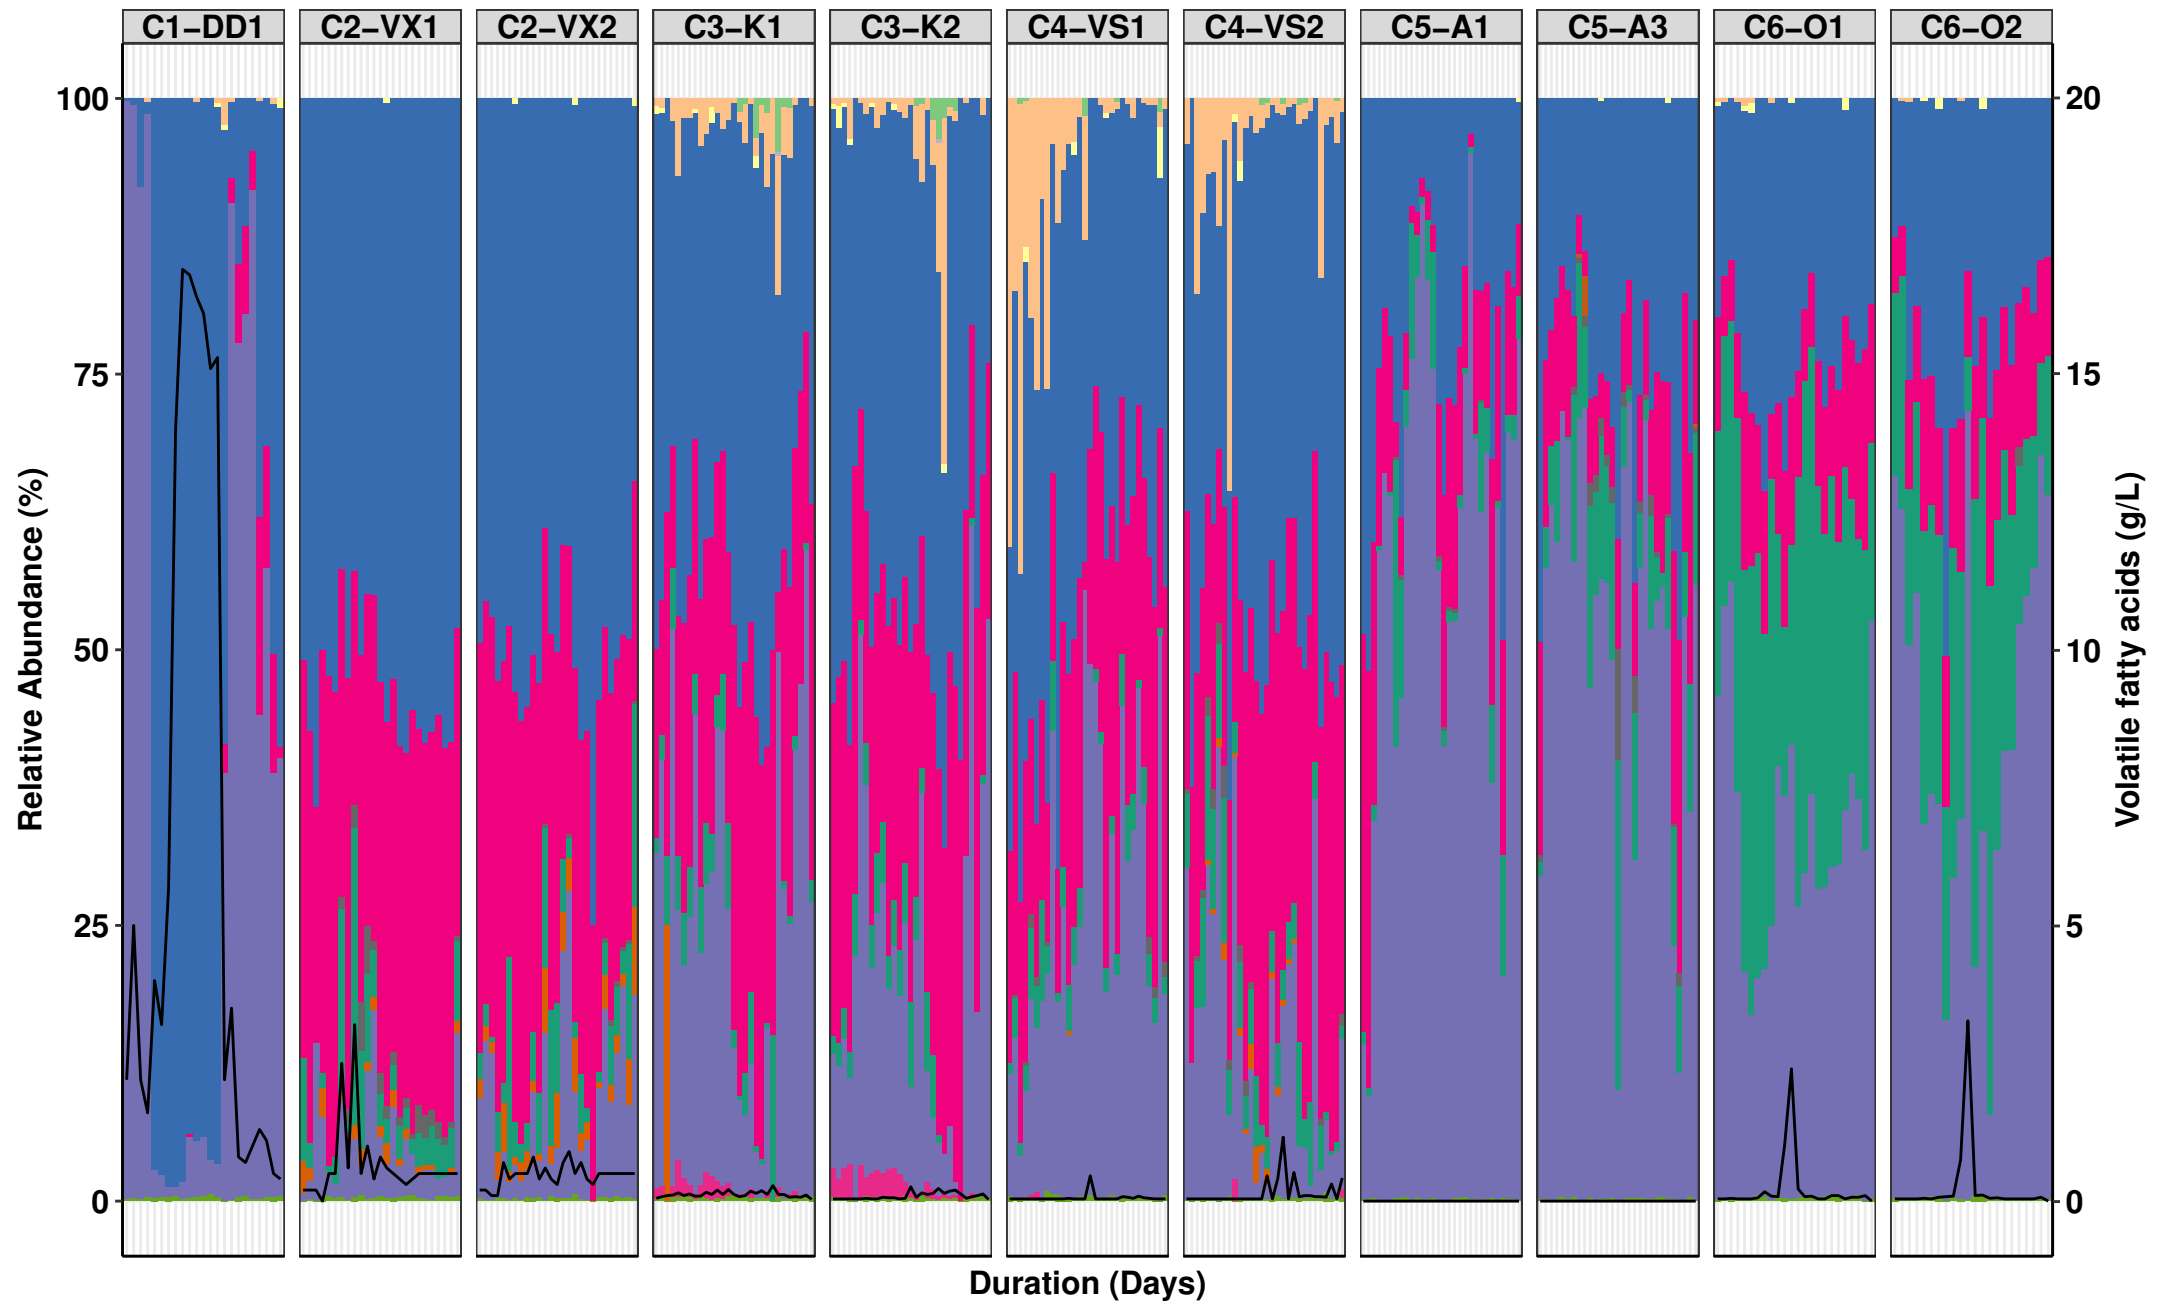

# S3C

FTHFS: Order level (> 2.0 %)

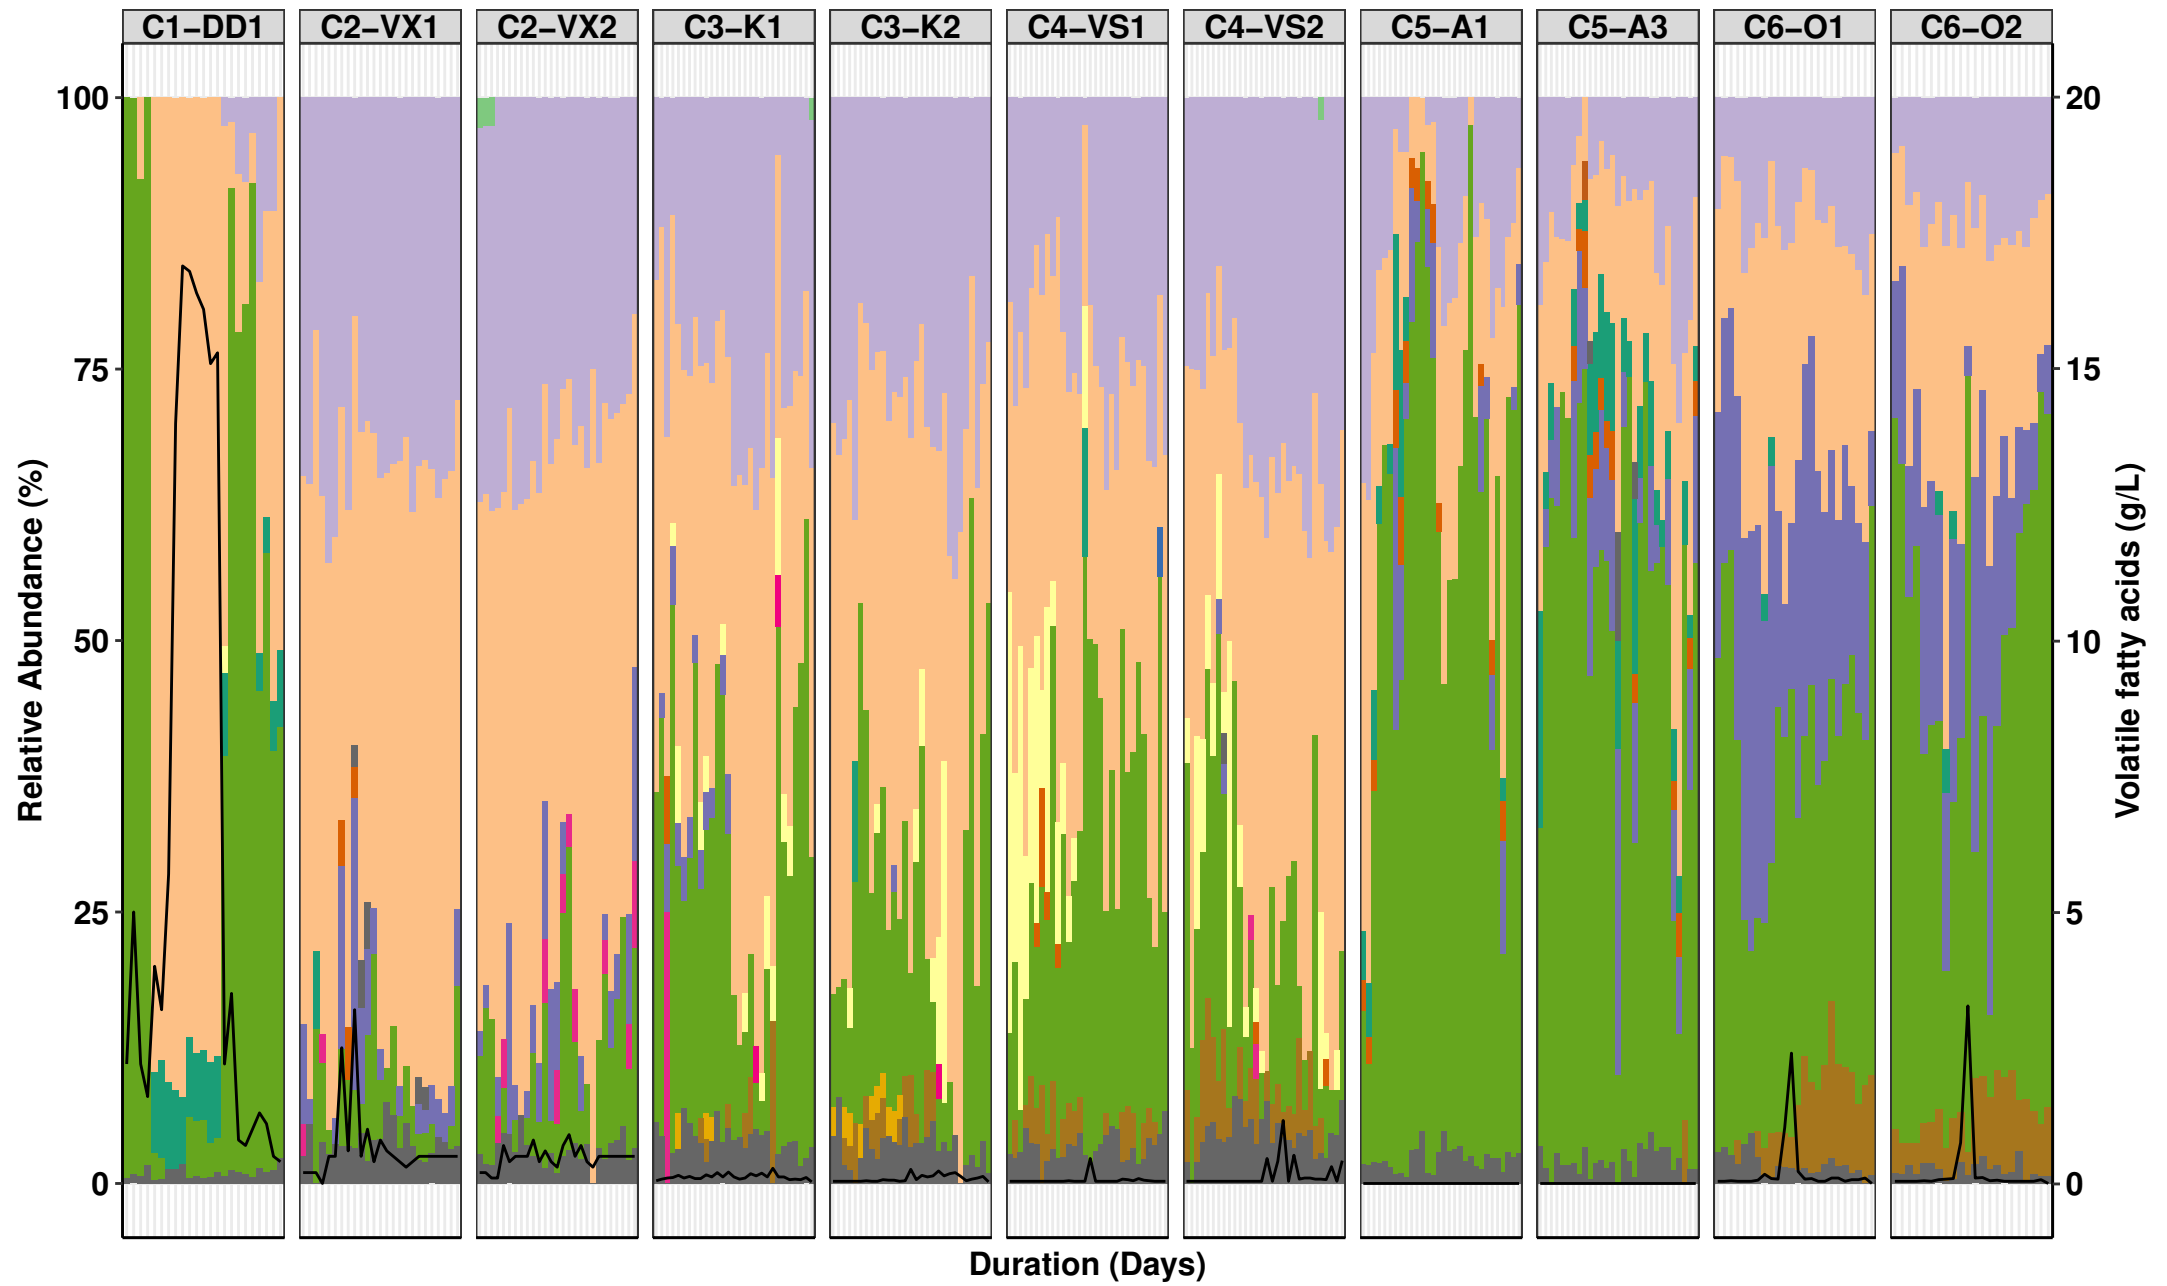

# S3D

FTHFS: Family level (> 3.0 %)

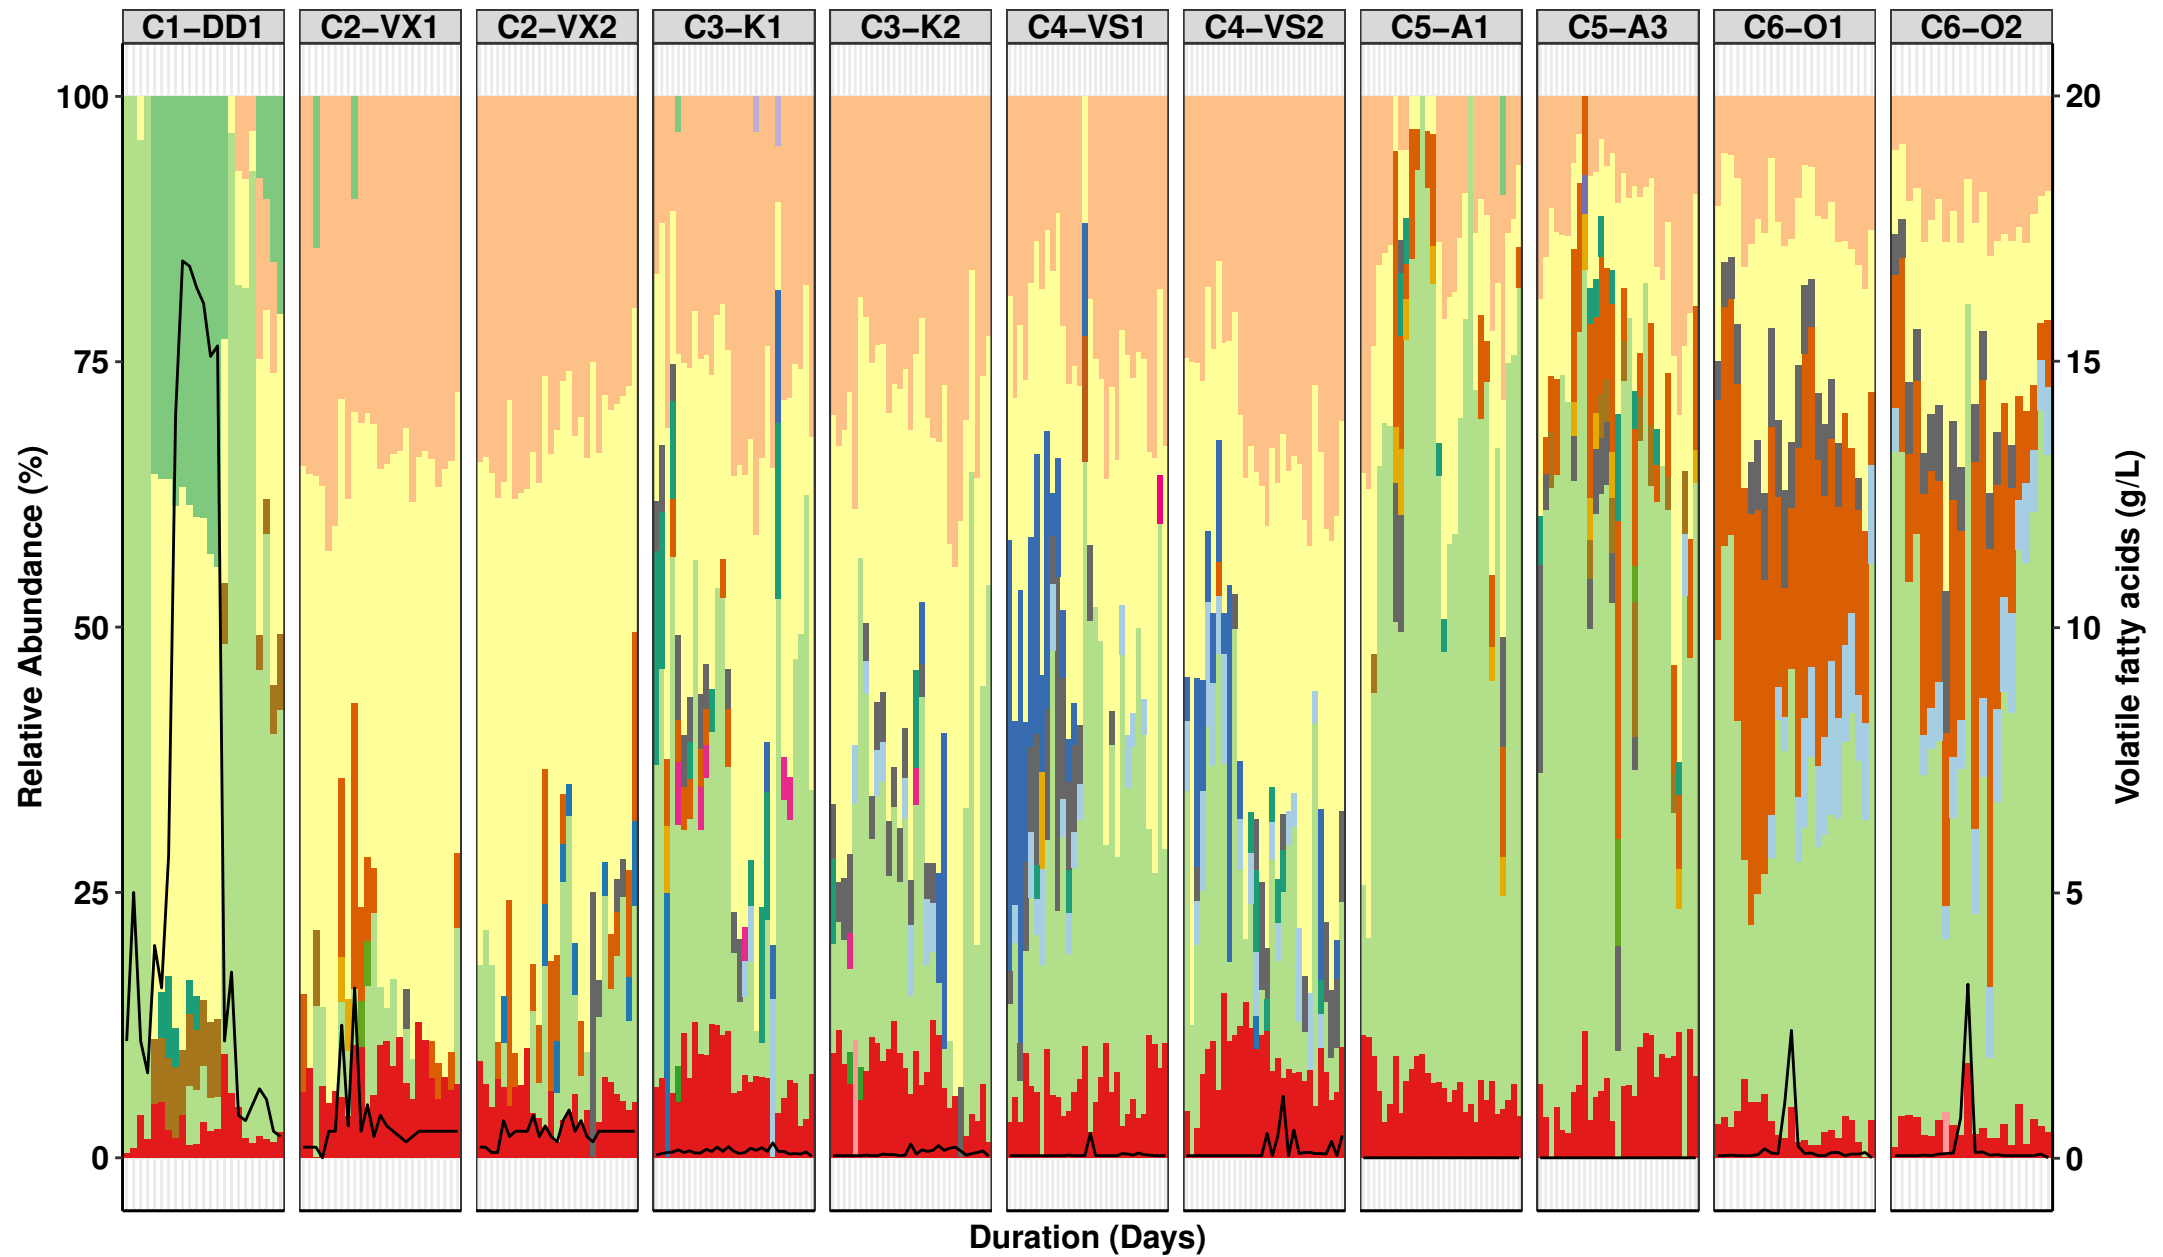

# S3E

FTHFS: Genus level (> 3.0 %)

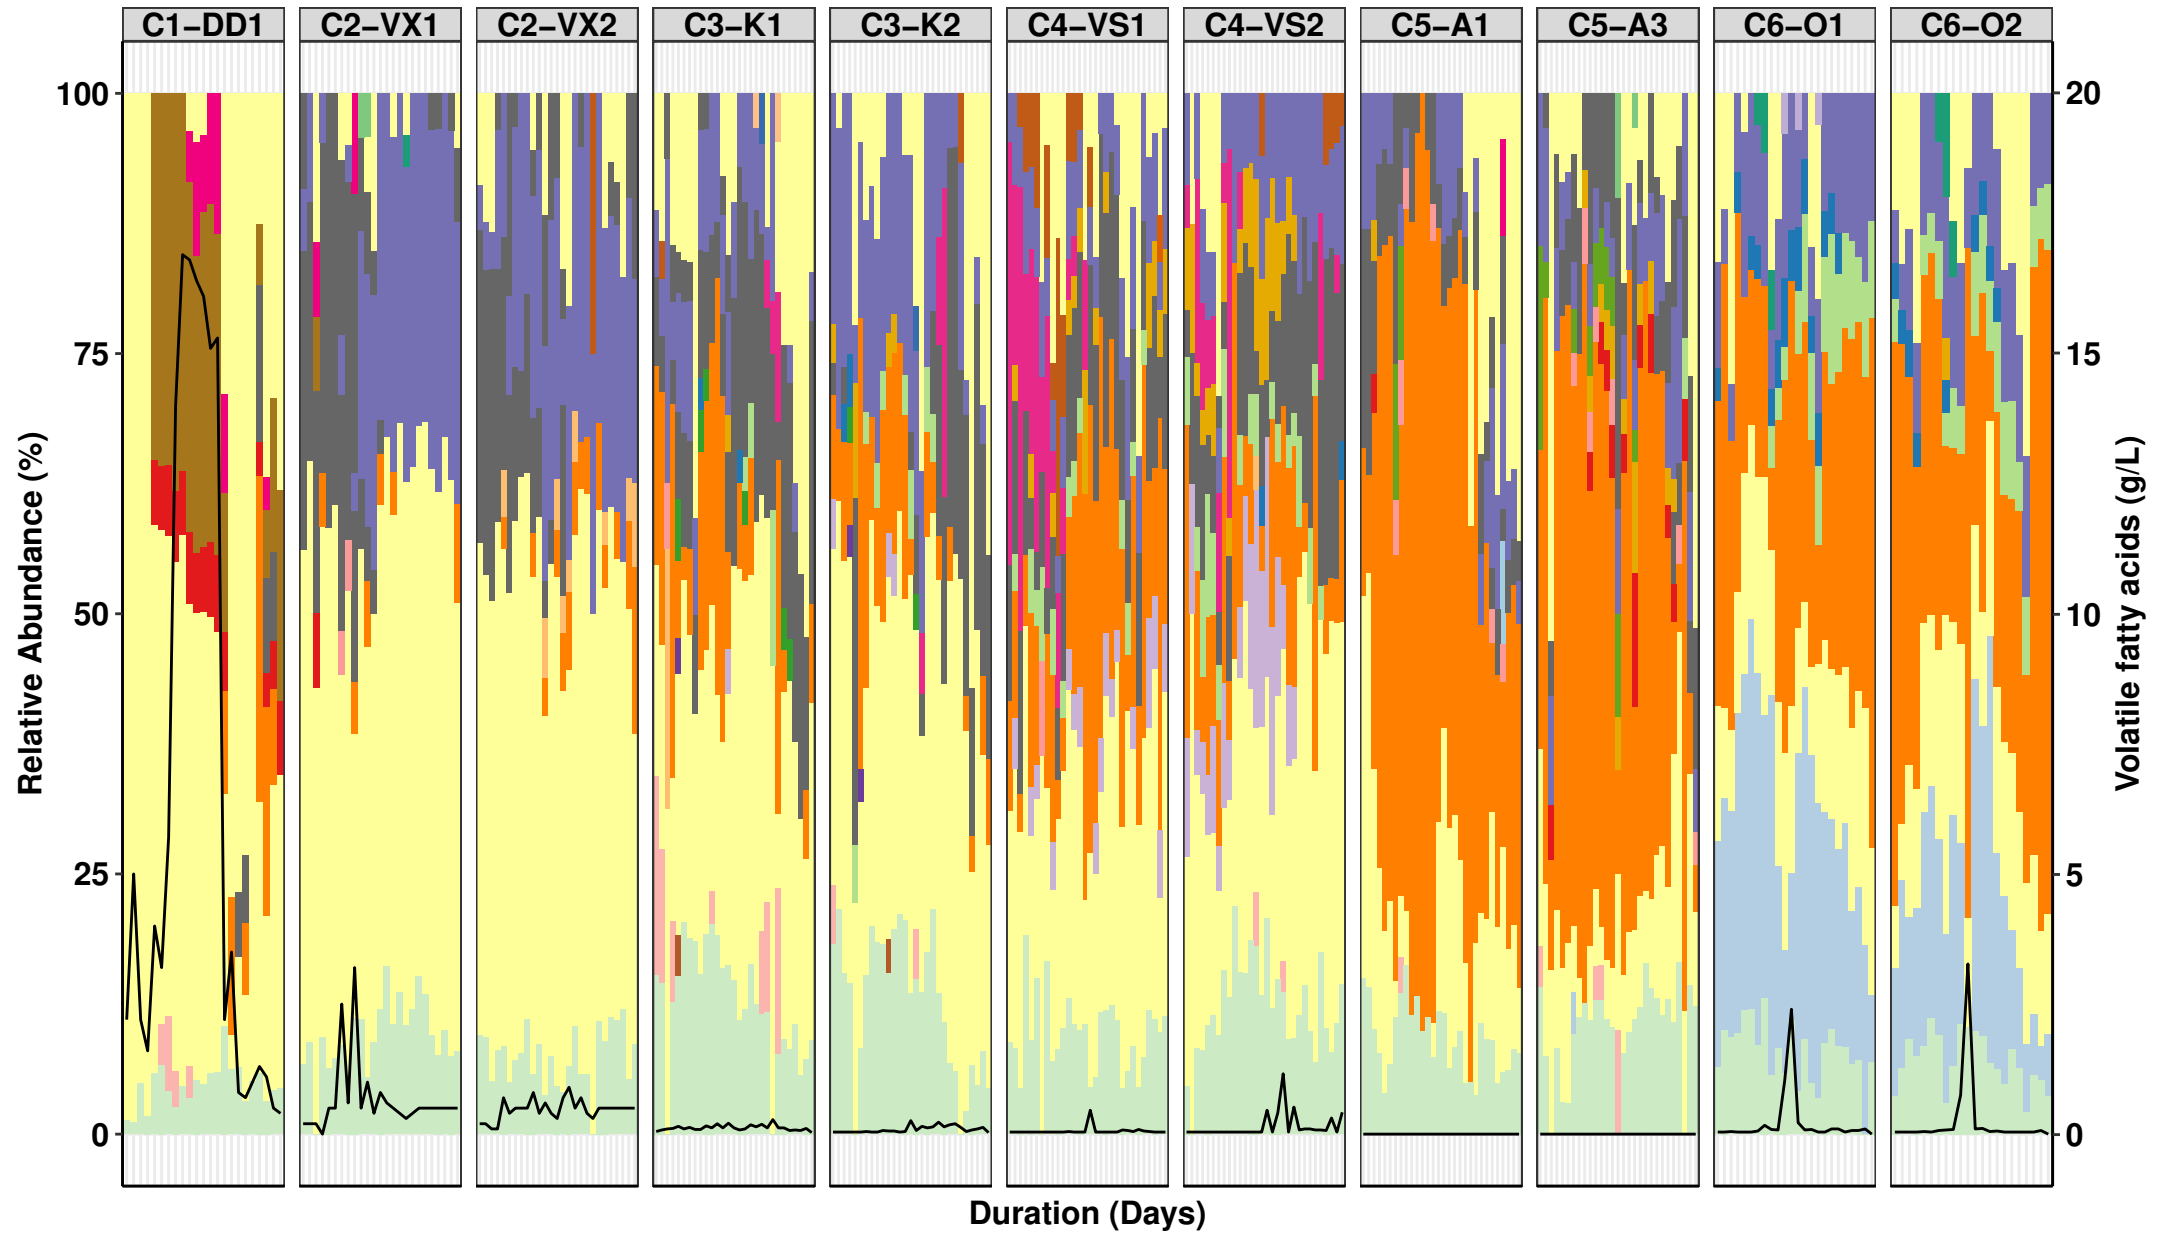

# S3F

FTHFS: Species level (> 3.0 %)

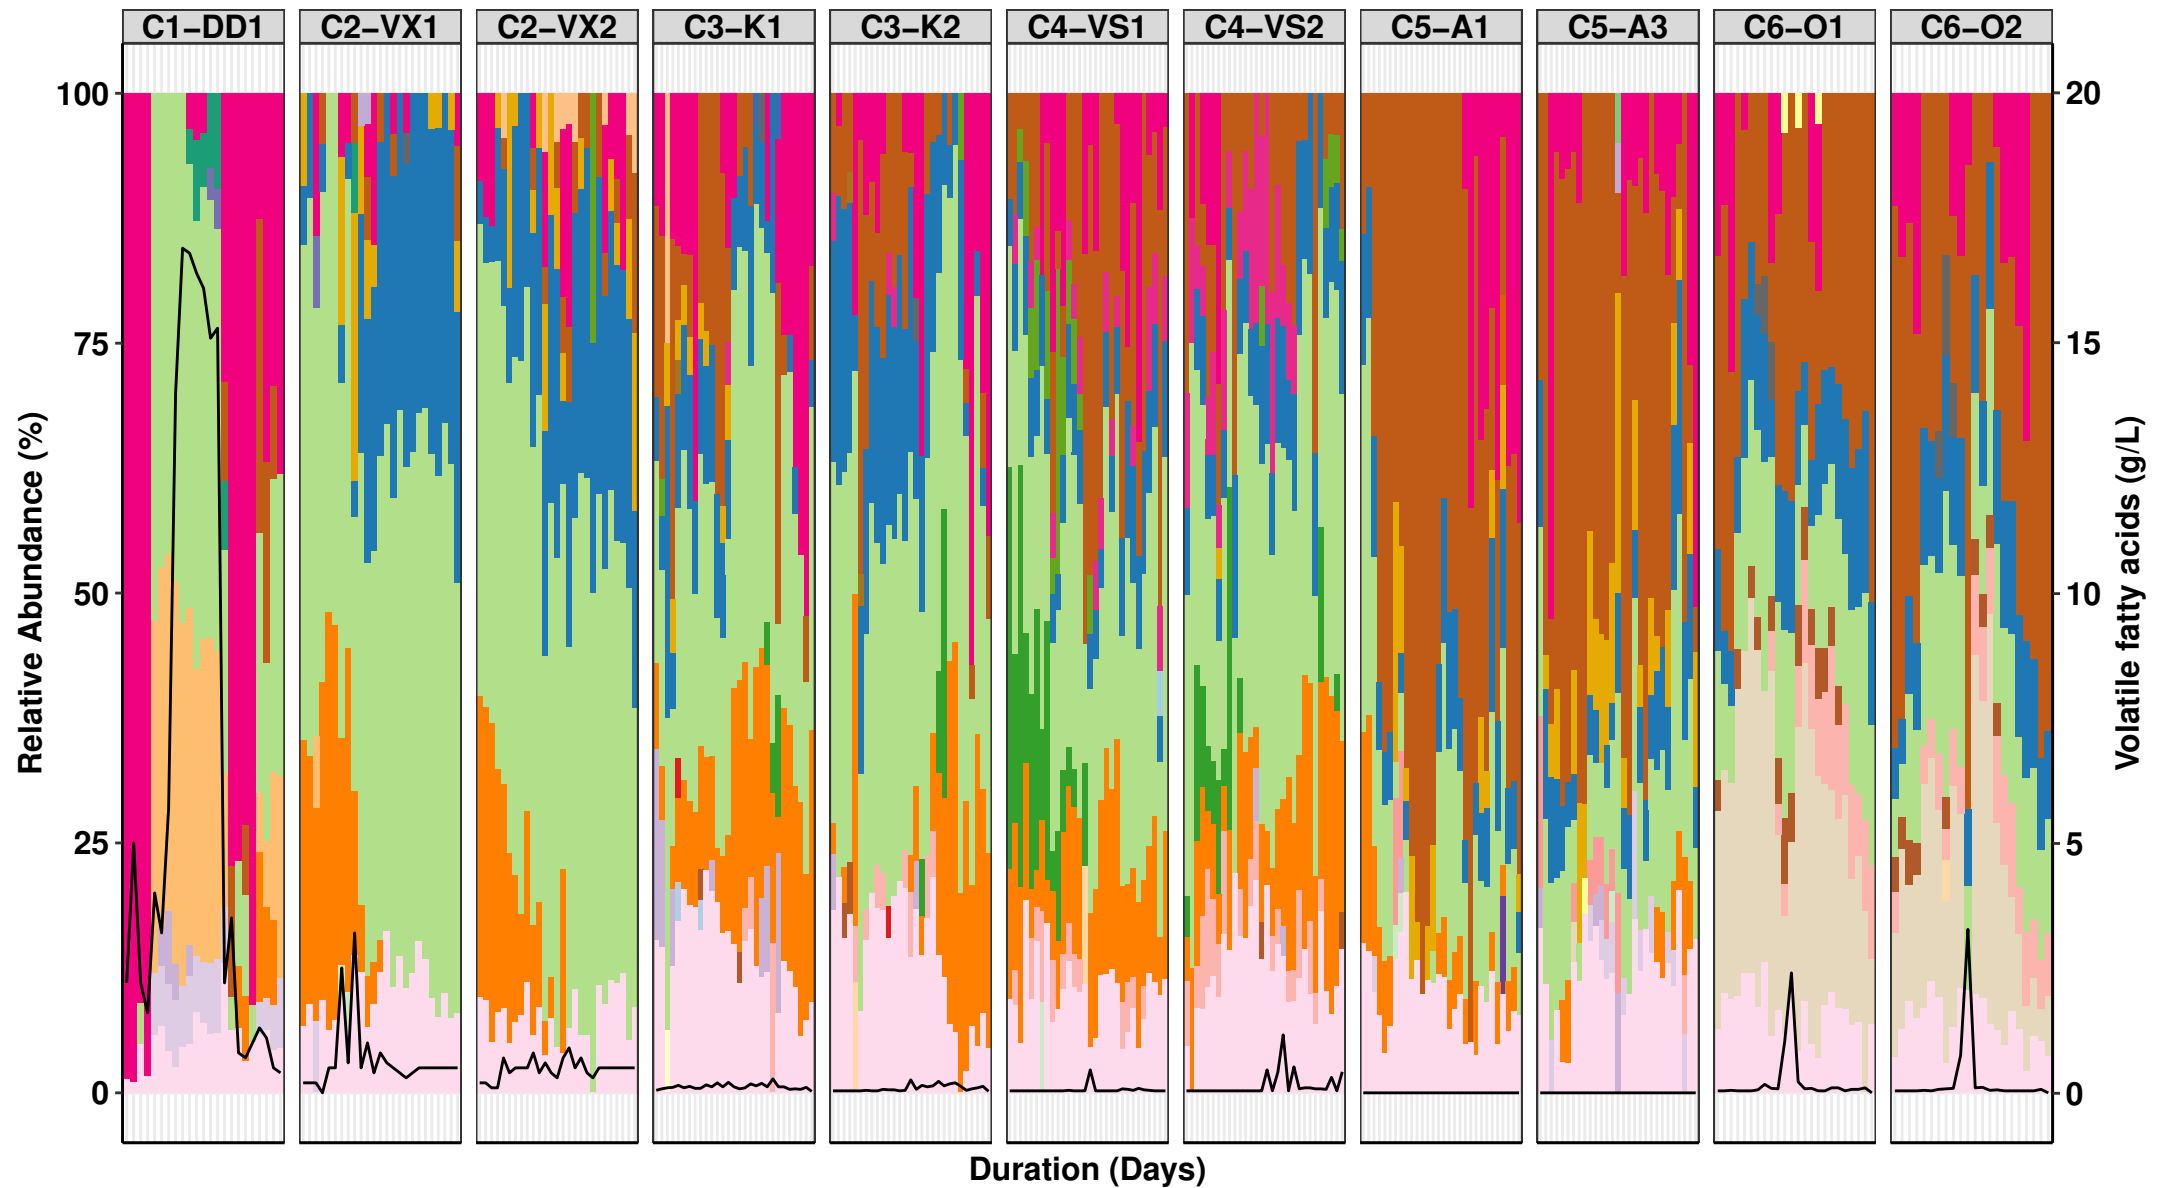

- |                                              |                             |                               |                                 |                                  |
|----------------------------------------------|-----------------------------|-------------------------------|---------------------------------|----------------------------------|
| Acetomicrobium_hydrogeniformans              | Clostridium_beijerinckii    | Geofilum_rhodophaeum          | Peptococcaceae_bacterium        | Thermoanaerobacterales_bacterium |
| Acetomicrobium_mobile                        | Clostridium_leptum          | Gordonibacter_sp              | Petroclostridium_xylanilyticum  | unclassified_Tepidanaerobacter   |
| Bacteroidetes_bacterium_HGW_Bacteroidetes_15 | Clostridium_sp              | Lachnospiraceae_bacterium     | Petrotoga_sp                    | Urinicoccus_massiliensis         |
| Blautia_obeum                                | Eggerthellaceae_bacterium   | Lactobacillus_antri           | Phoceia_massiliensis            | x-Minor Species(<3%)             |
| Brachybacterium_sp                           | Faecalibacterium_sp         | Mahella_australiensis         | Sedimentibacter_sp              |                                  |
| Candidatus_Cloacimonas_sp._UBA10088          | Finegoldia_magna            | Oscillospiraceae_bacterium    | Streptococcus_uberis            |                                  |
| Candidatus_Cloacimonetes_bacterium           | Firmicutes_bacterium_CAG-94 | Oxobacter_pfenngii            | Tepidanaerobacter_acetatoxydans |                                  |
| Candidatus_Desulforudis_audaxviator          | Flavonifractor_plautii      | Paraeggerthella_hongkongensis | Thermoanaerobacter_kivui        |                                  |
