# Supplementary material for: AcetoBase Version 2: a database update and re-analysis of formyltetrahydrofolate synthetase amplicon sequencing data from anaerobic digesters
Source: Oxford University Press journal article supplement (doi:10.1093/database/baac041), 2022-01-01

## Supplementary Figures: S1A-F

### **AcetoBase Version 2: A database update and re-analysis of formyltetrahydrofolate synthetase amplicon sequencing data from anaerobic digesters**

Abhijeet Singh<sup>1\*</sup>, Anna Schnürer<sup>1\*</sup>

<sup>1</sup>Anaerobic Microbiology and Biotechnology Group, Department of Molecular Sciences, Swedish University of Agricultural Sciences, Almas Allé 5, Uppsala, SE-750 07, Uppsala, Sweden

\*For correspondence. E-mail: [anna.schnurer@slu.se](mailto:anna.schnurer@slu.se); [abhijeet.singh@slu.se](mailto:abhijeet.singh@slu.se), Tel. +46 18671000; Fax +46 18672000; Address: Department of Molecular Sciences, Box 7025, 75007 Uppsala, Sweden

#### **Description:**

The supplementary figures S1A-F (phylum-species level) are generated in present study by the reanalysis of the FTHFS amplicon sequence data (reactor GR2) from the study by Singh *et al.* (2020) and additional data mentioned in the present study (reactor GR1).

#### **Reference:**

Singh, A., Nylander, J. A. A., Schnürer, A., Bongcam-Rudloff, E., and Müller, B. (2020). High-Throughput Sequencing and Unsupervised Analysis of Formyltetrahydrofolate Synthetase (FTHFS) Gene Amplicons to Estimate Acetogenic Community Structure. *Front. Microbiol.* 11, 1–13. doi:10.3389/fmicb.2020.02066.

S1A

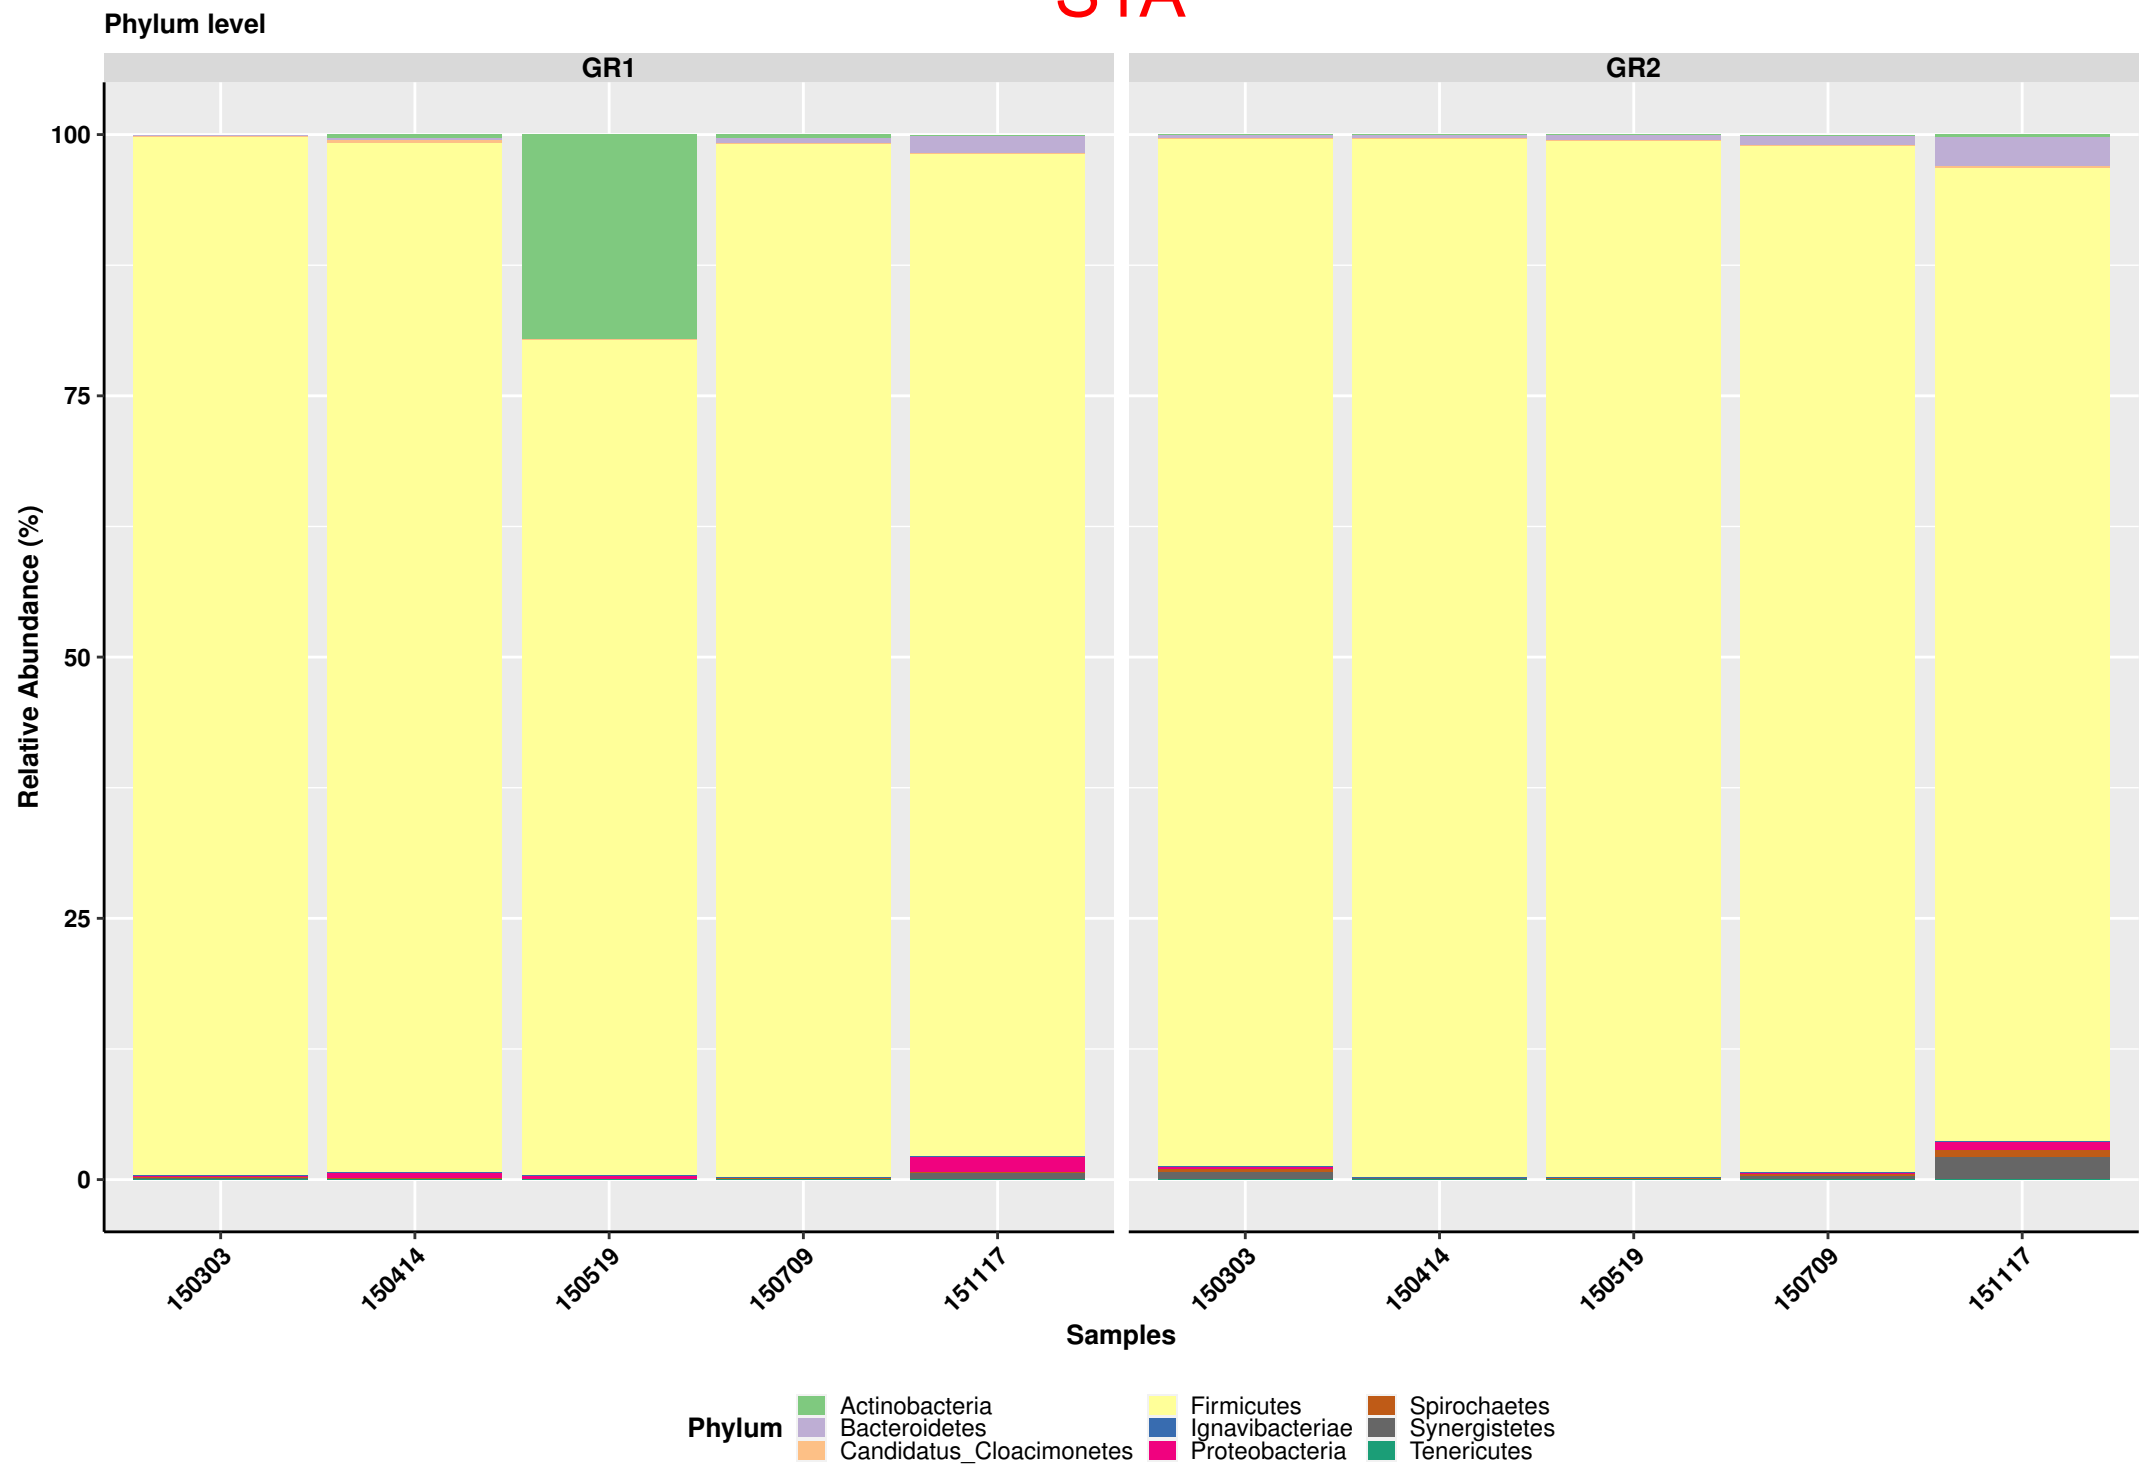

# S1B

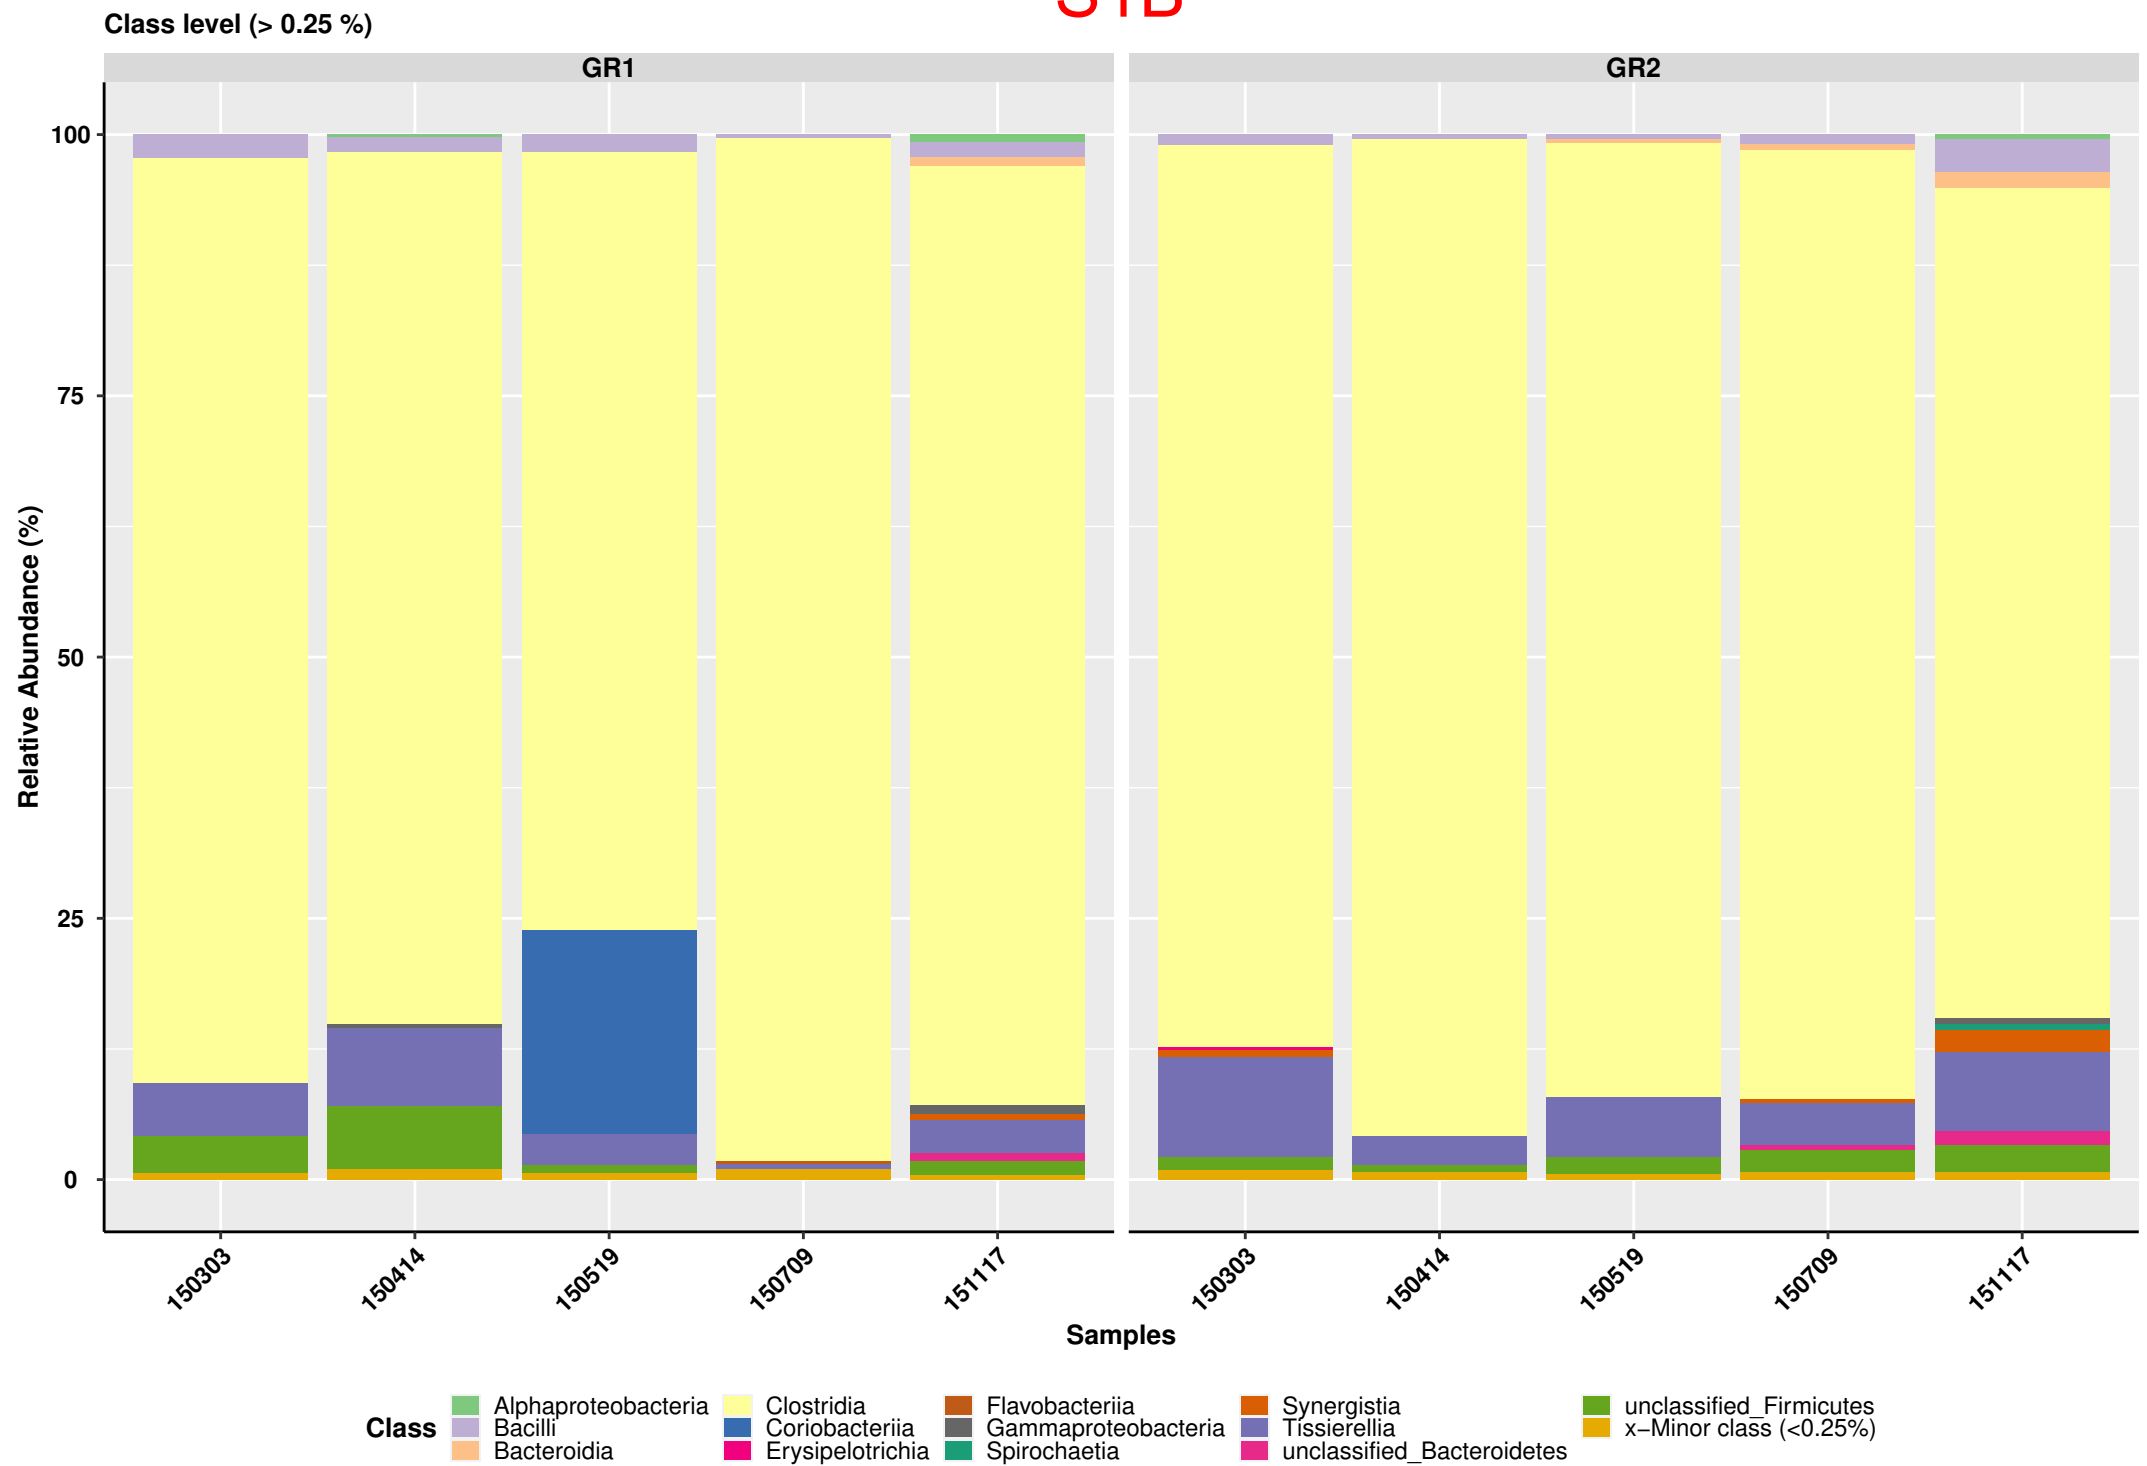

S1C

**Order level (> 0.25 %)**

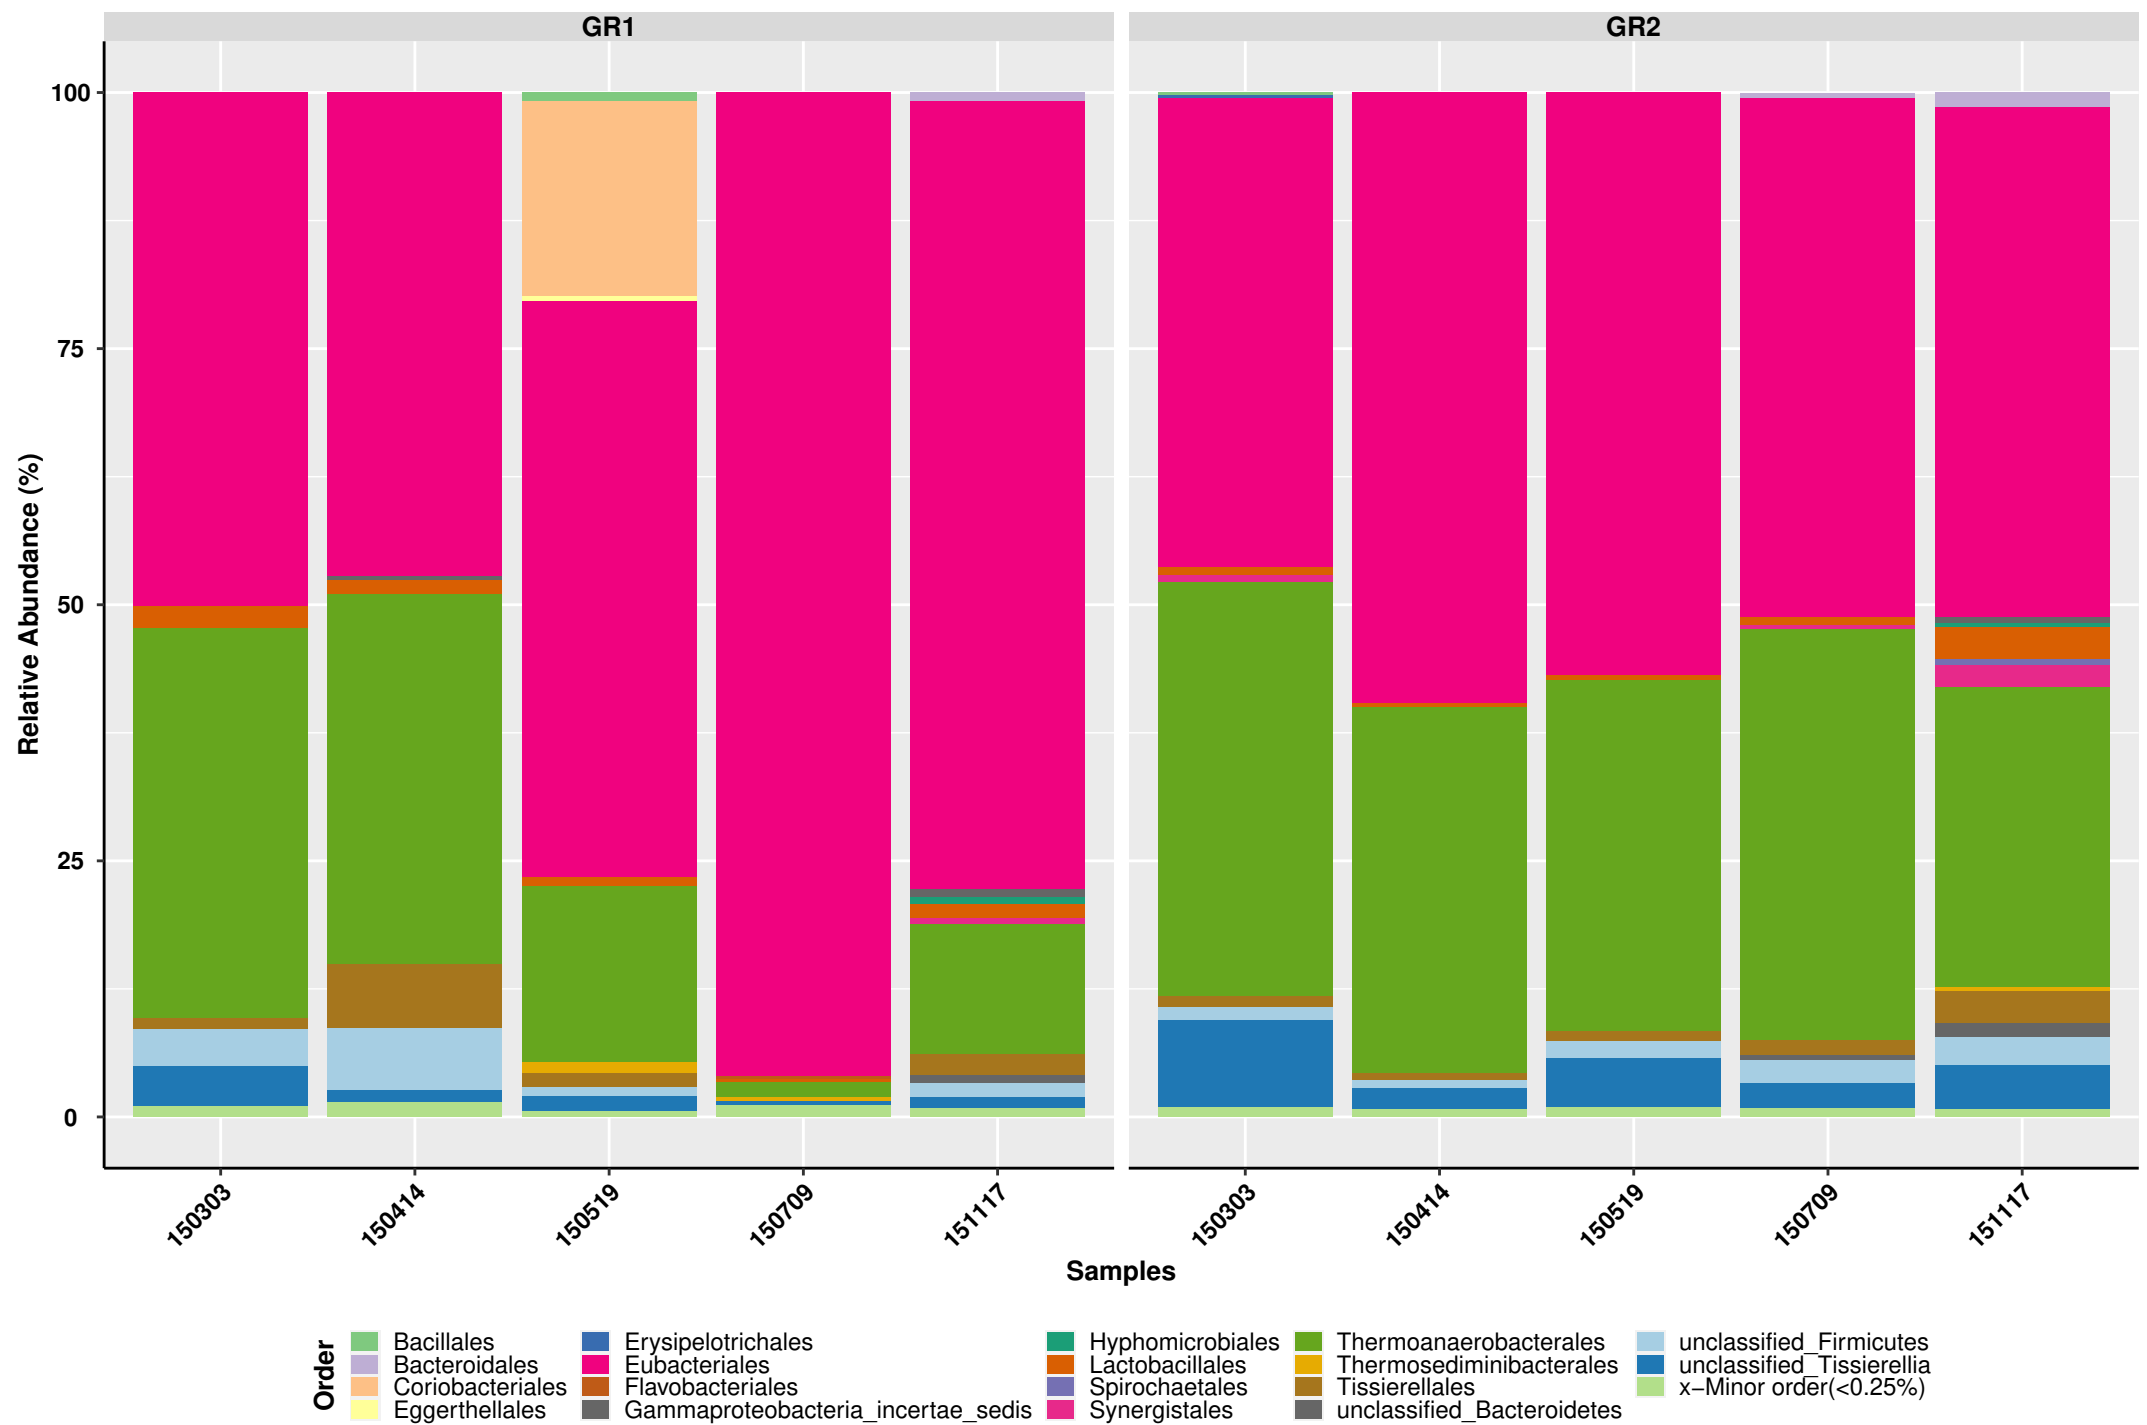

# S1D

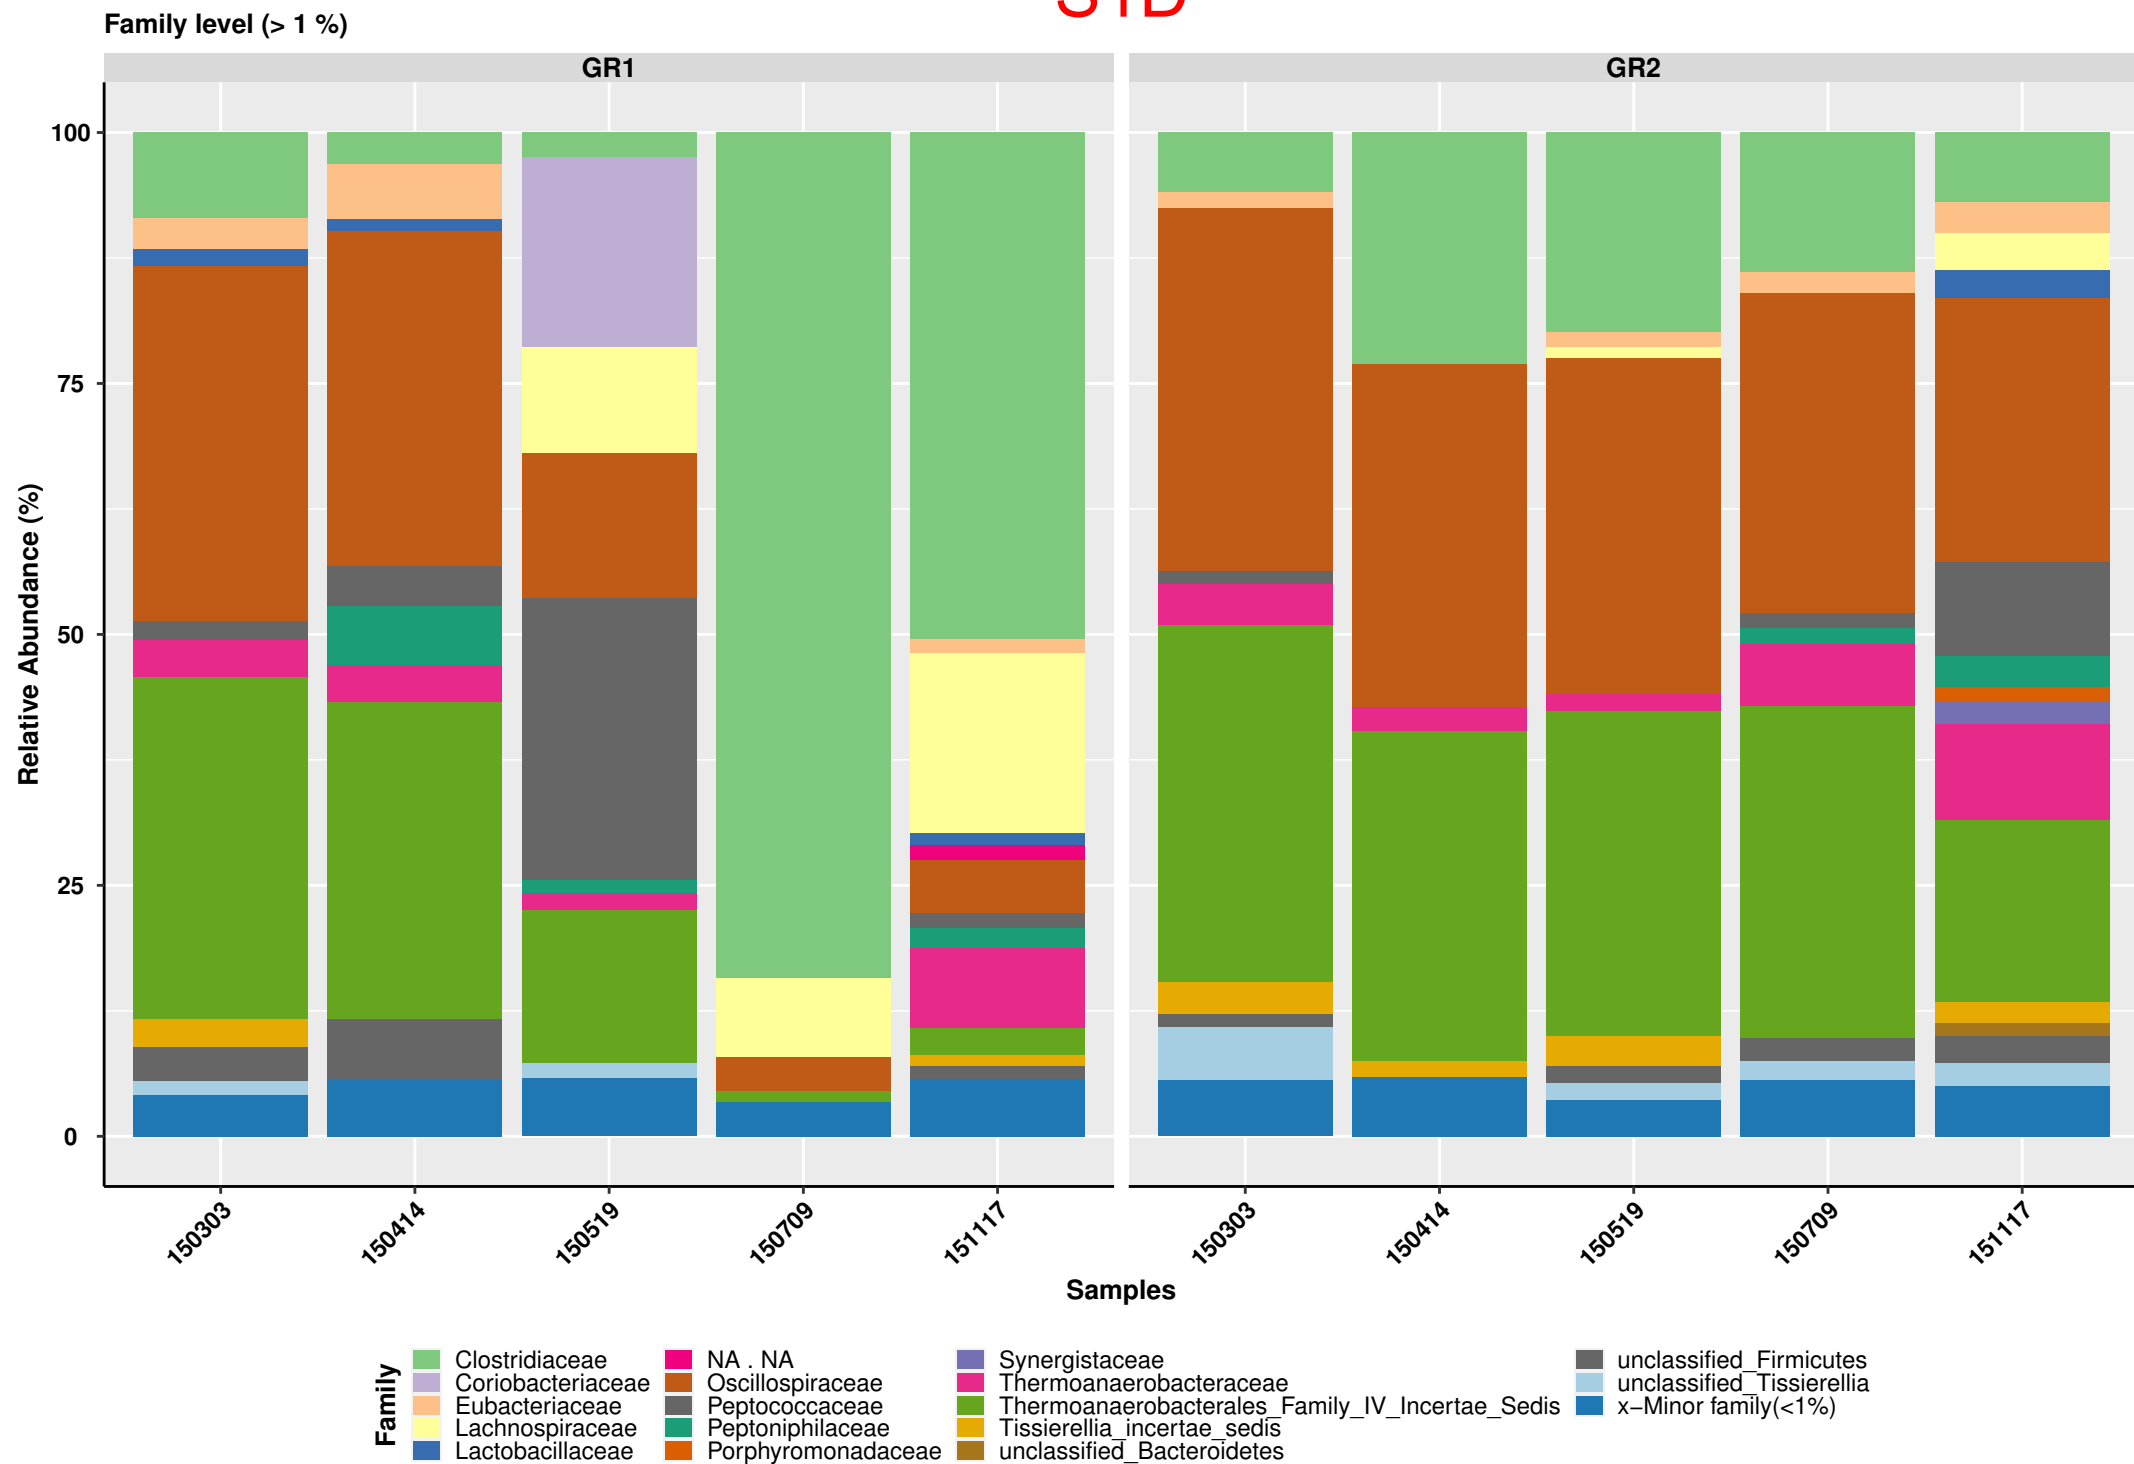

# S1E

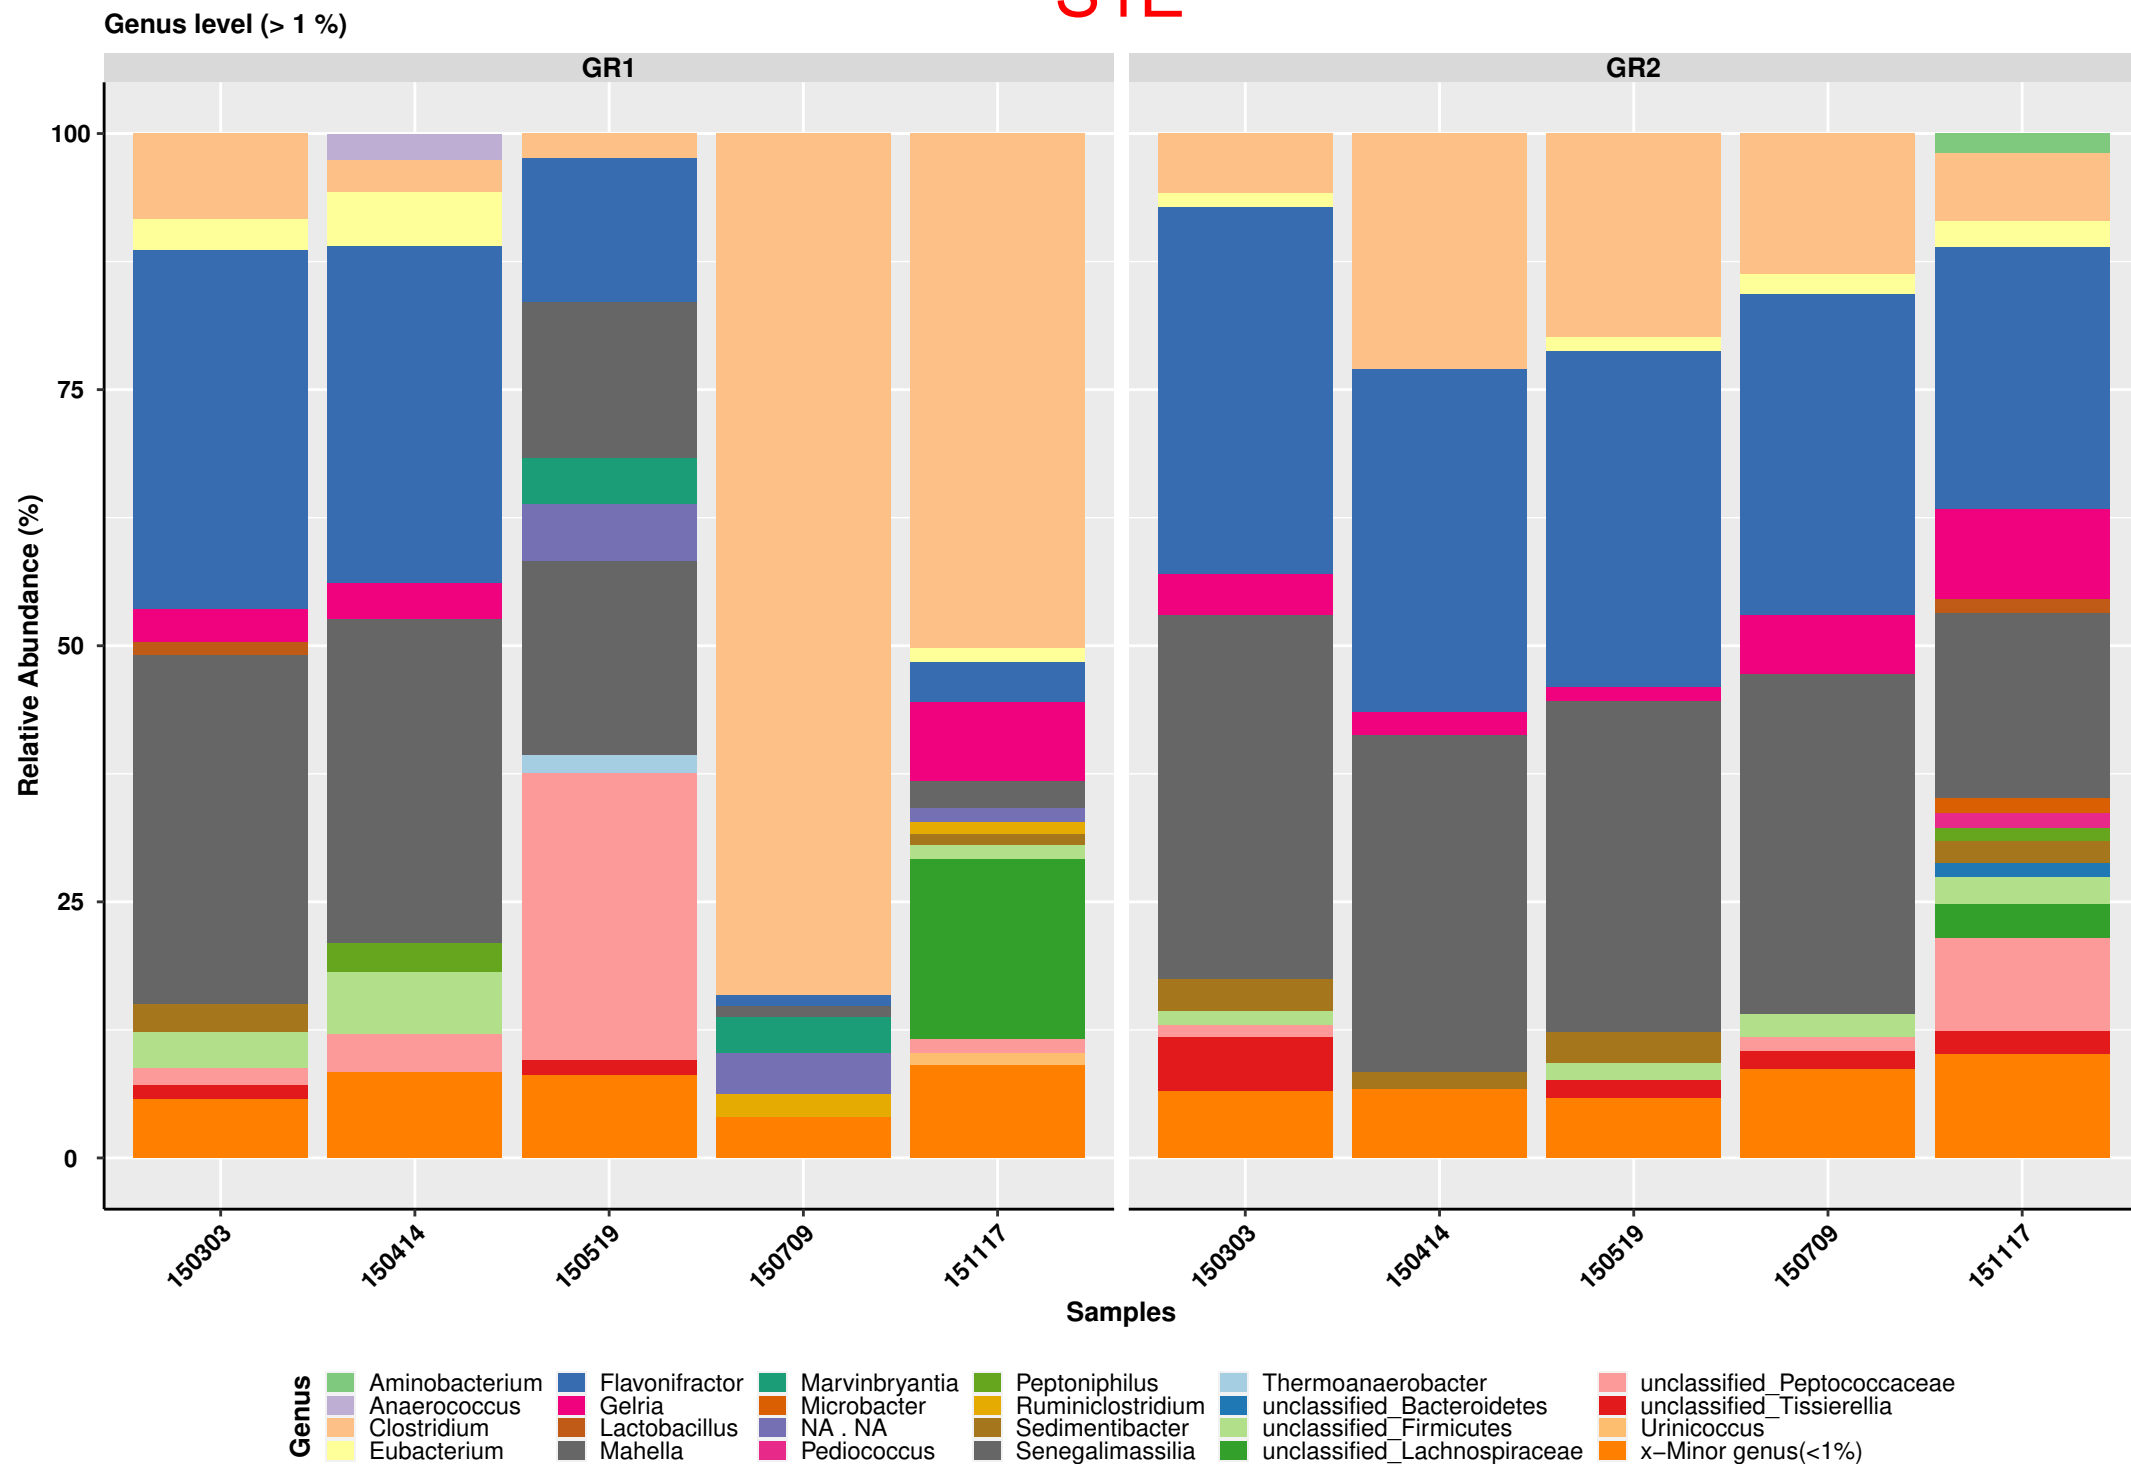

# S1F

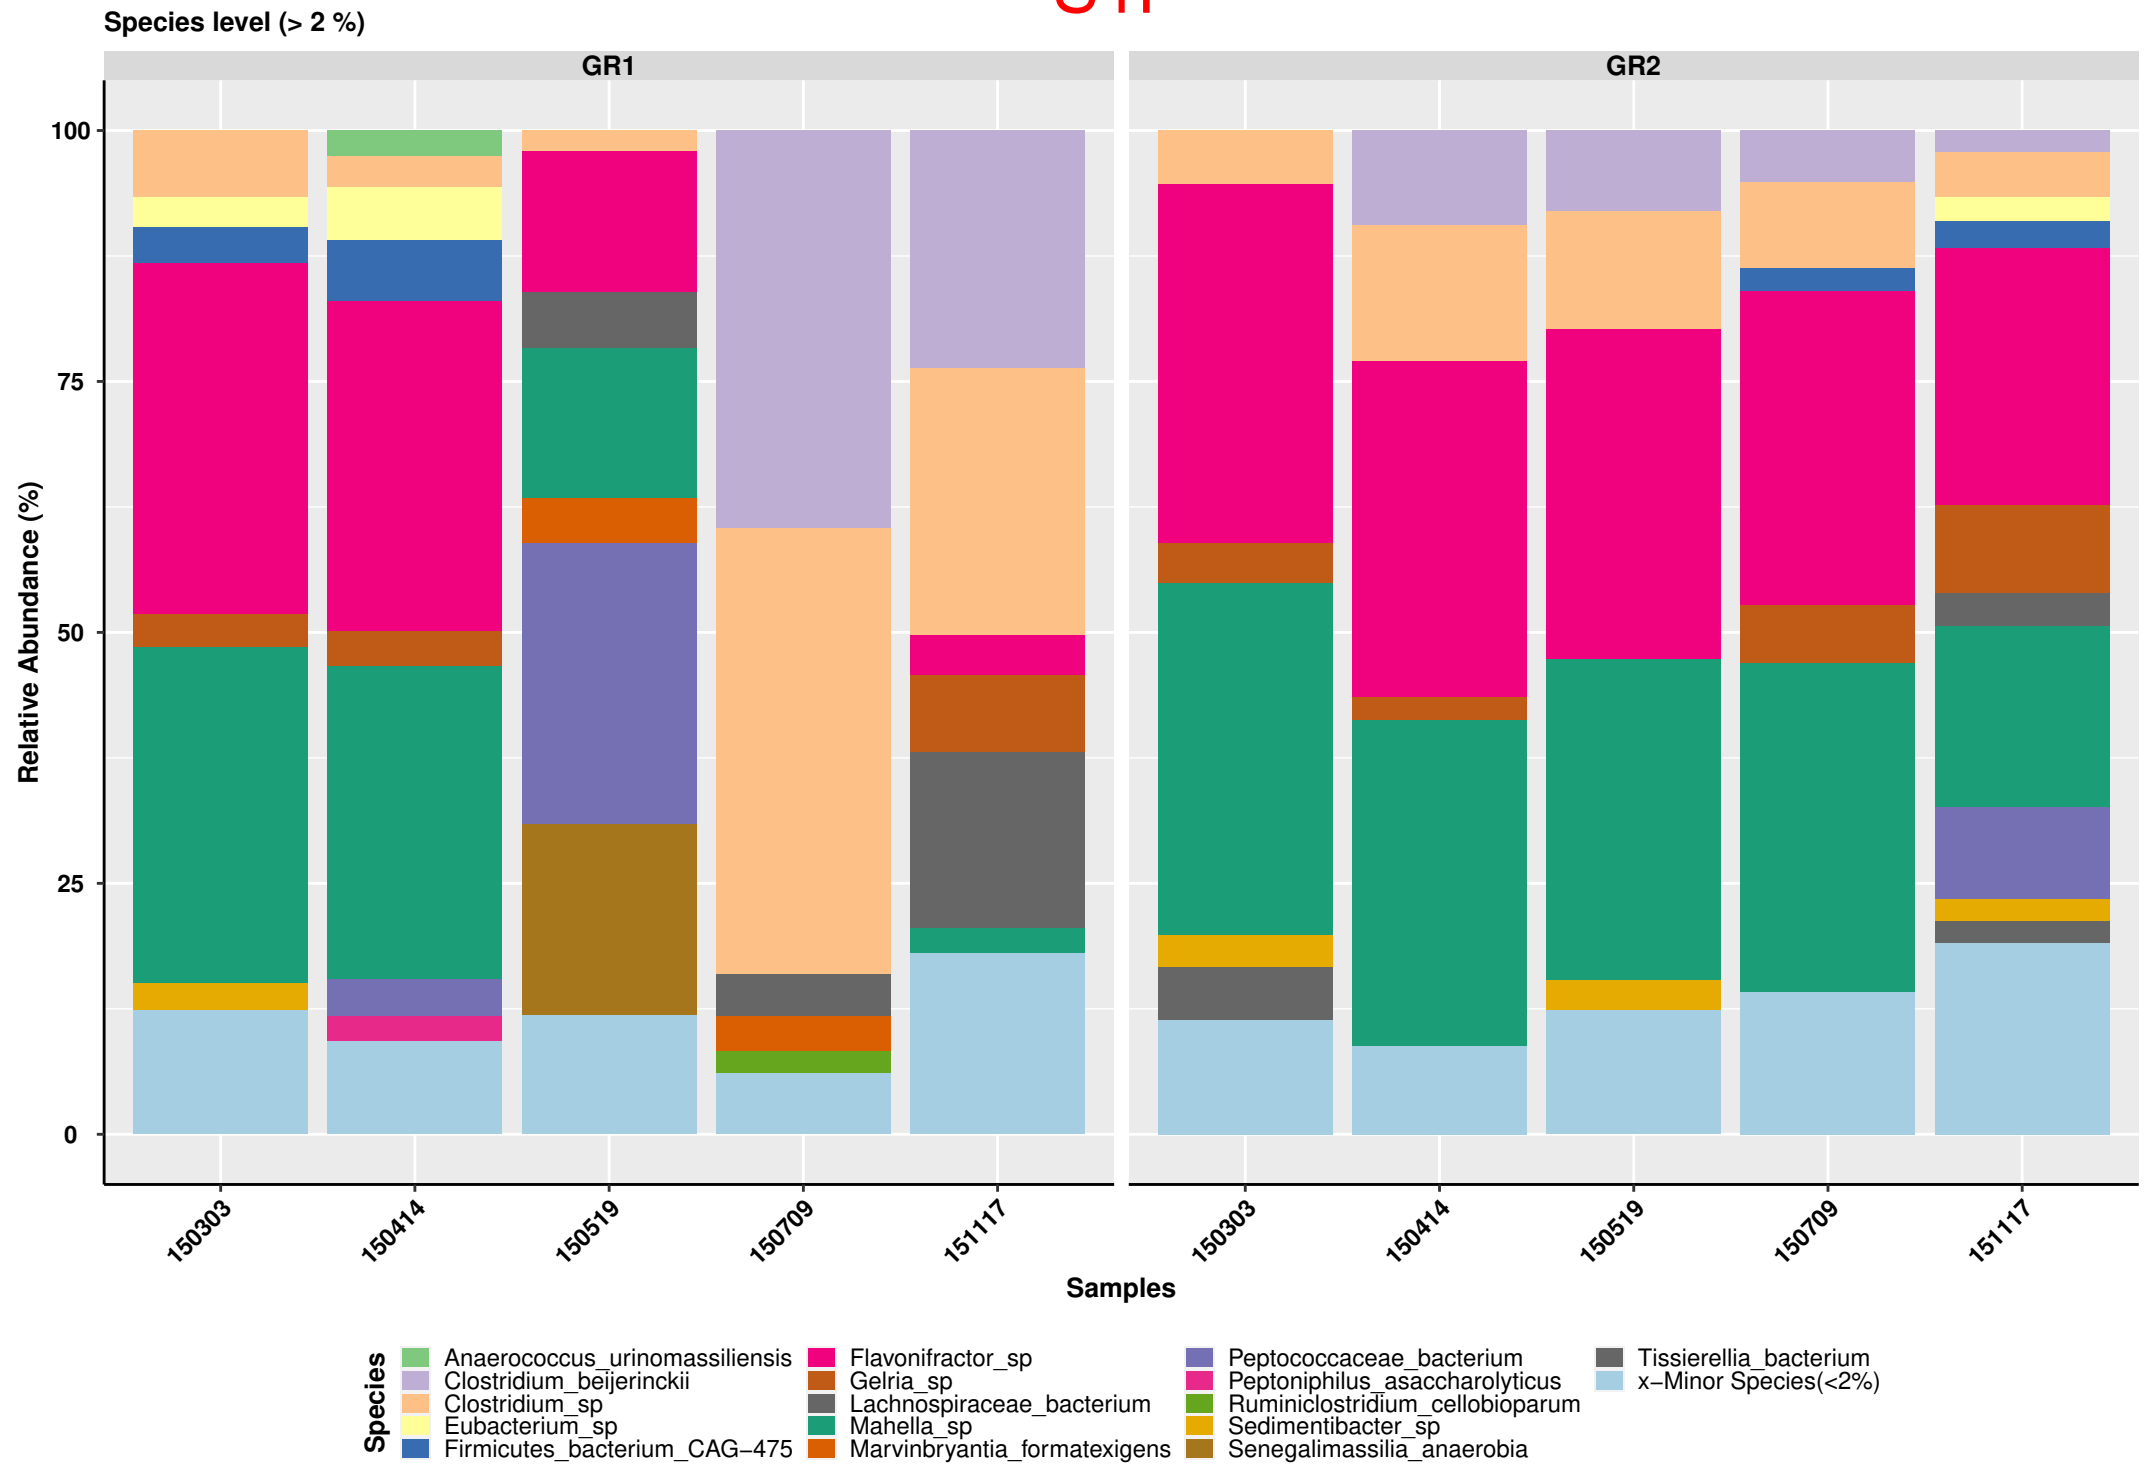

Supplement: baac041_supp.zip [file baac041_supp.zip]
