# Supplementary material for: AcetoBase Version 2: a database update and re-analysis of formyltetrahydrofolate synthetase amplicon sequencing data from anaerobic digesters
Source: Oxford University Press journal article supplement (doi:10.1093/database/baac041), 2022-01-01

## Supplementary Figures: S2A-F

### **AcetoBase Version 2: A database update and re-analysis of formyltetrahydrofolate synthetase amplicon sequencing data from anaerobic digesters**

Abhijeet Singh<sup>1\*</sup>, Anna Schnürer<sup>1\*</sup>

<sup>1</sup>Anaerobic Microbiology and Biotechnology Group, Department of Molecular Sciences, Swedish University of Agricultural Sciences, Almas Allé 5, Uppsala, SE-750 07, Uppsala, Sweden

\*For correspondence. E-mail: [anna.schnurer@slu.se](mailto:anna.schnurer@slu.se); [abhijeet.singh@slu.se](mailto:abhijeet.singh@slu.se), Tel. +46 18671000; Fax +46 18672000; Address: Department of Molecular Sciences, Box 7025, 75007 Uppsala, Sweden

#### **Description:**

The supplementary figures S2A-F (phylum-species level) are generated in present study by the reanalysis of the FTHFS amplicon sequence data from the study by Singh *et al.* (2021).

#### **Reference:**

Singh, A., Müller, B., and Schnürer, A. (2021). Profiling temporal dynamics of acetogenic communities in anaerobic digesters using next-generation sequencing and T-RFLP. *Sci. Rep.* 11, 13298. doi:10.1038/s41598-021-92658-2.

# S2A

FTHFS-community: Phylum Relative Abundance (> 1 %)

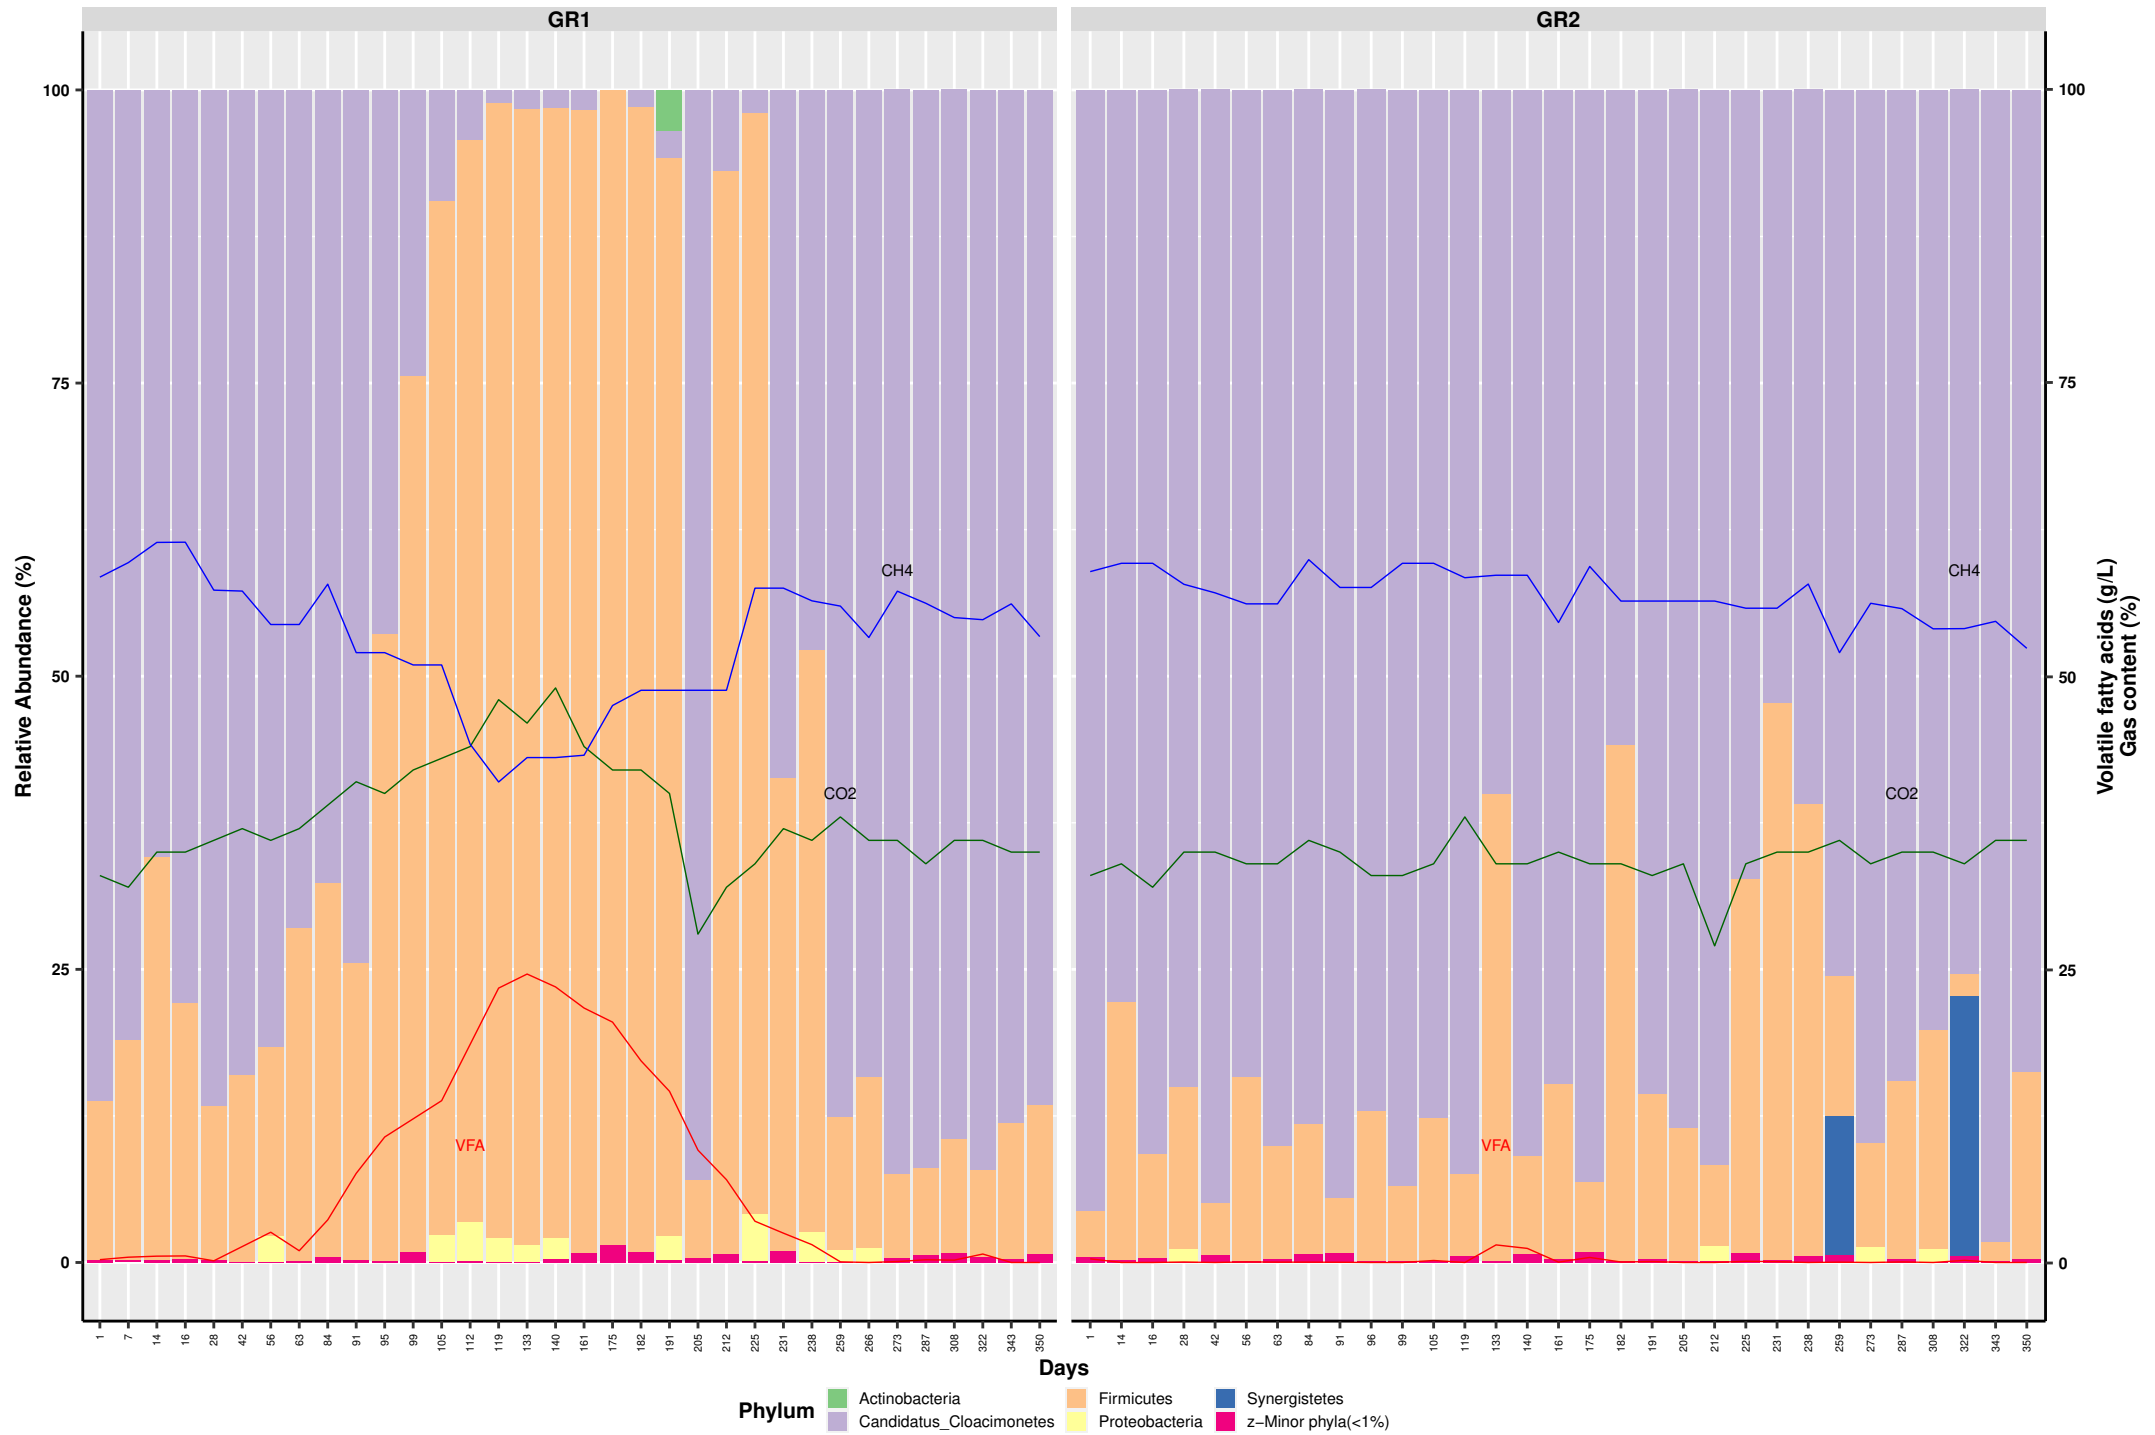

# S2B

FTHFS-community: Class Relative Abundance (> 1 %)

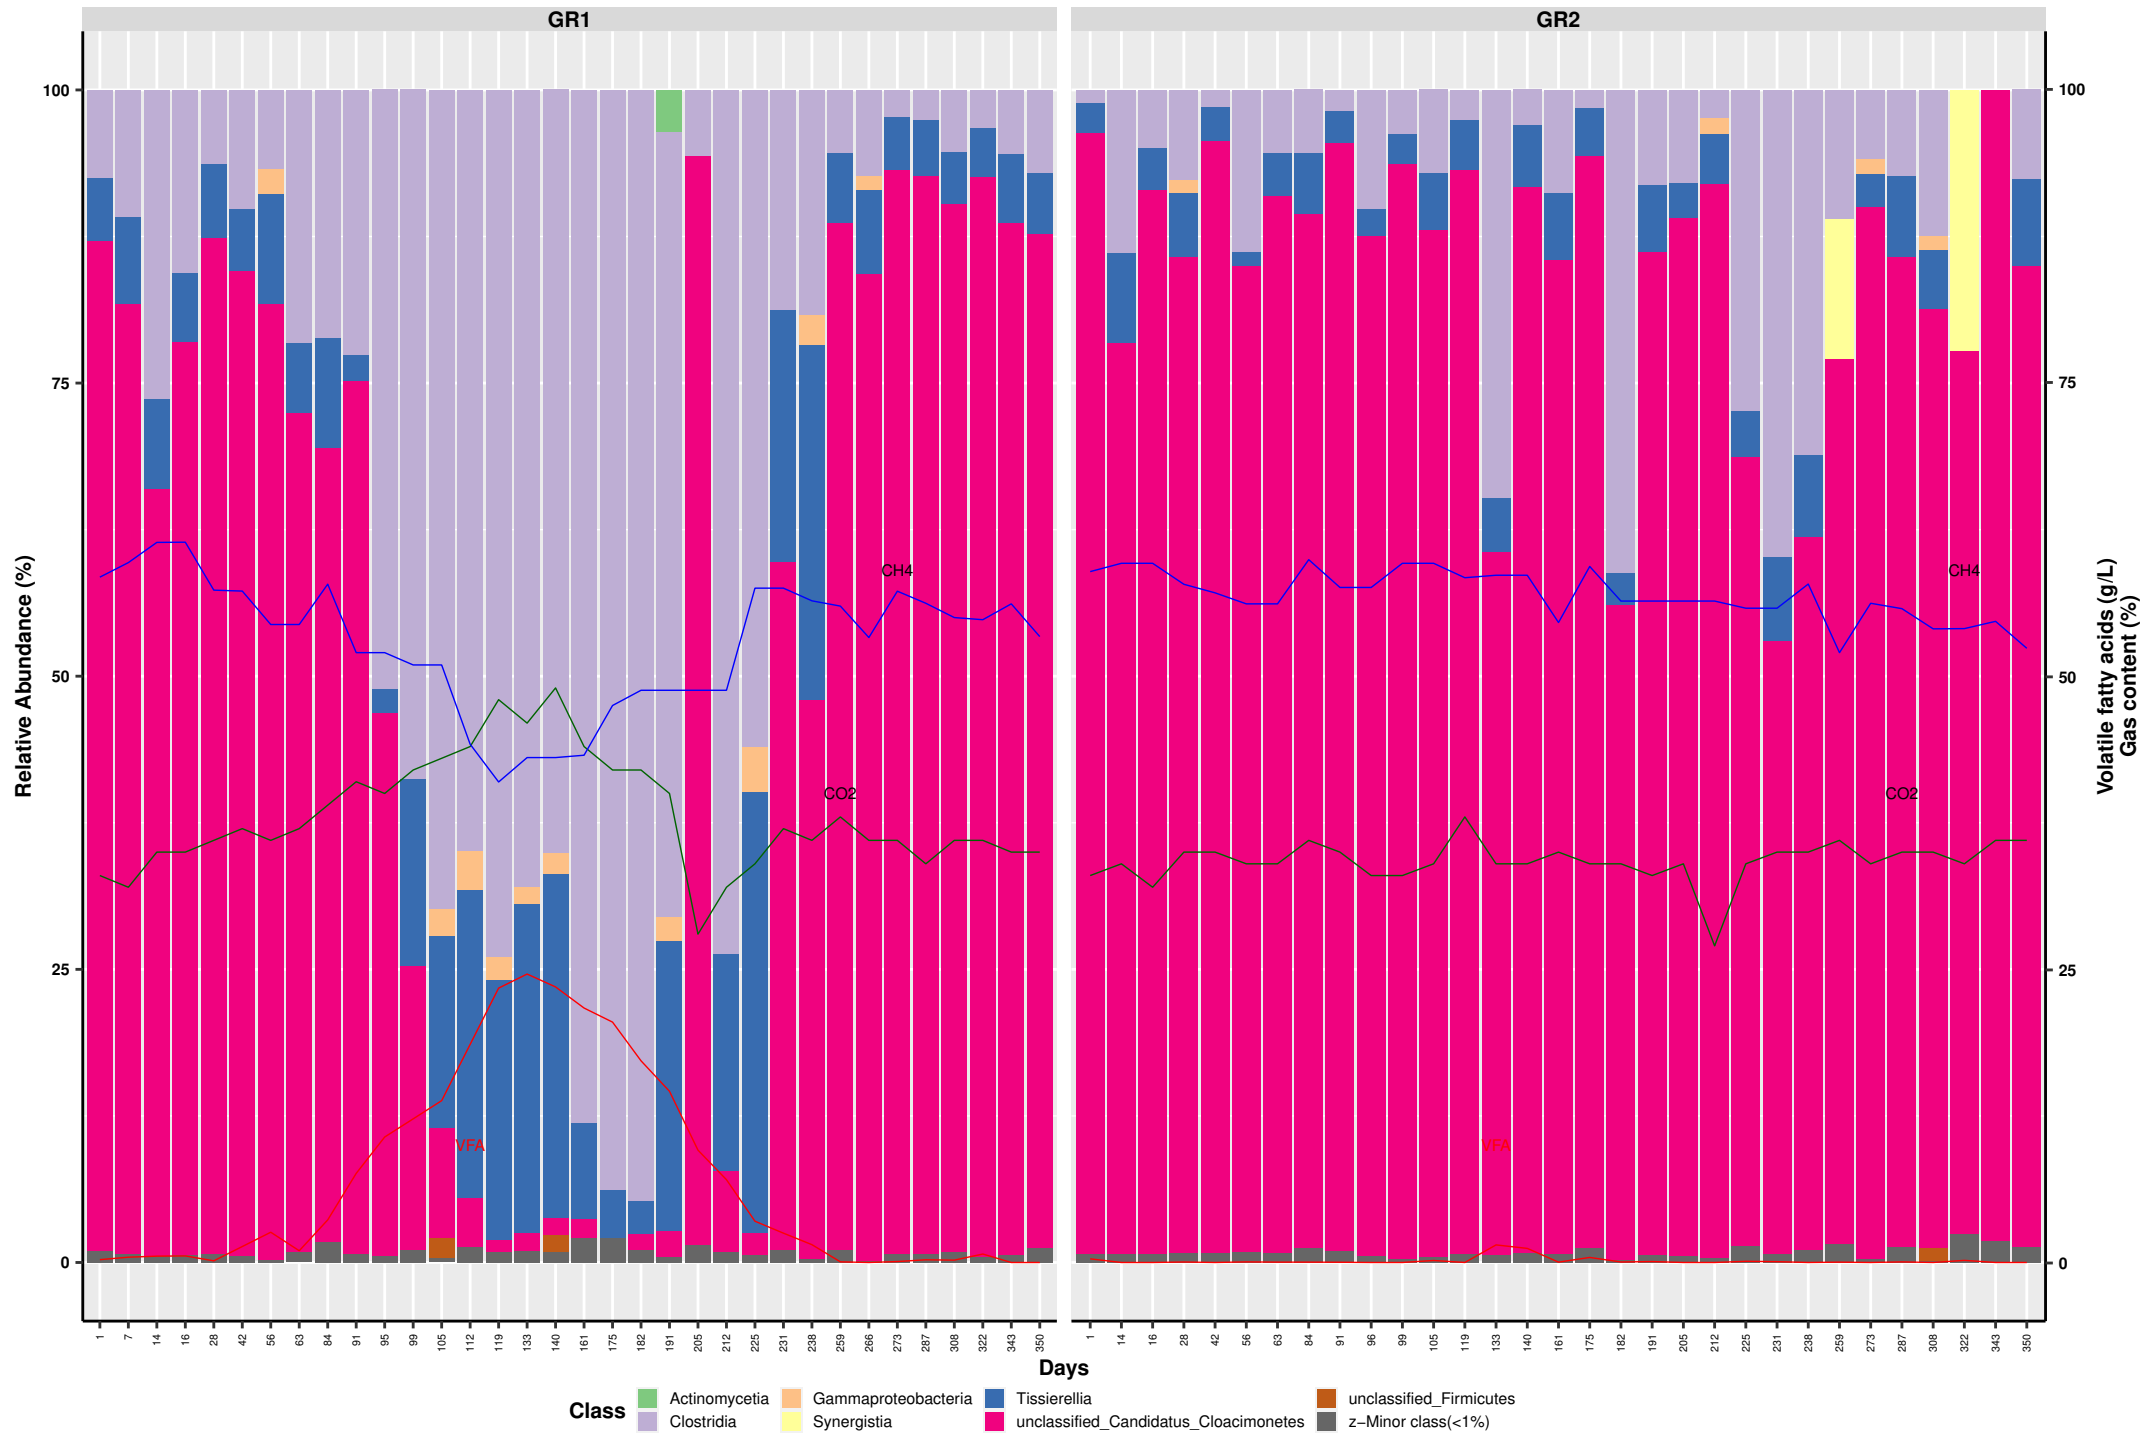

# S2C

FTHFS-community: Order Relative Abundance (> 1 %)

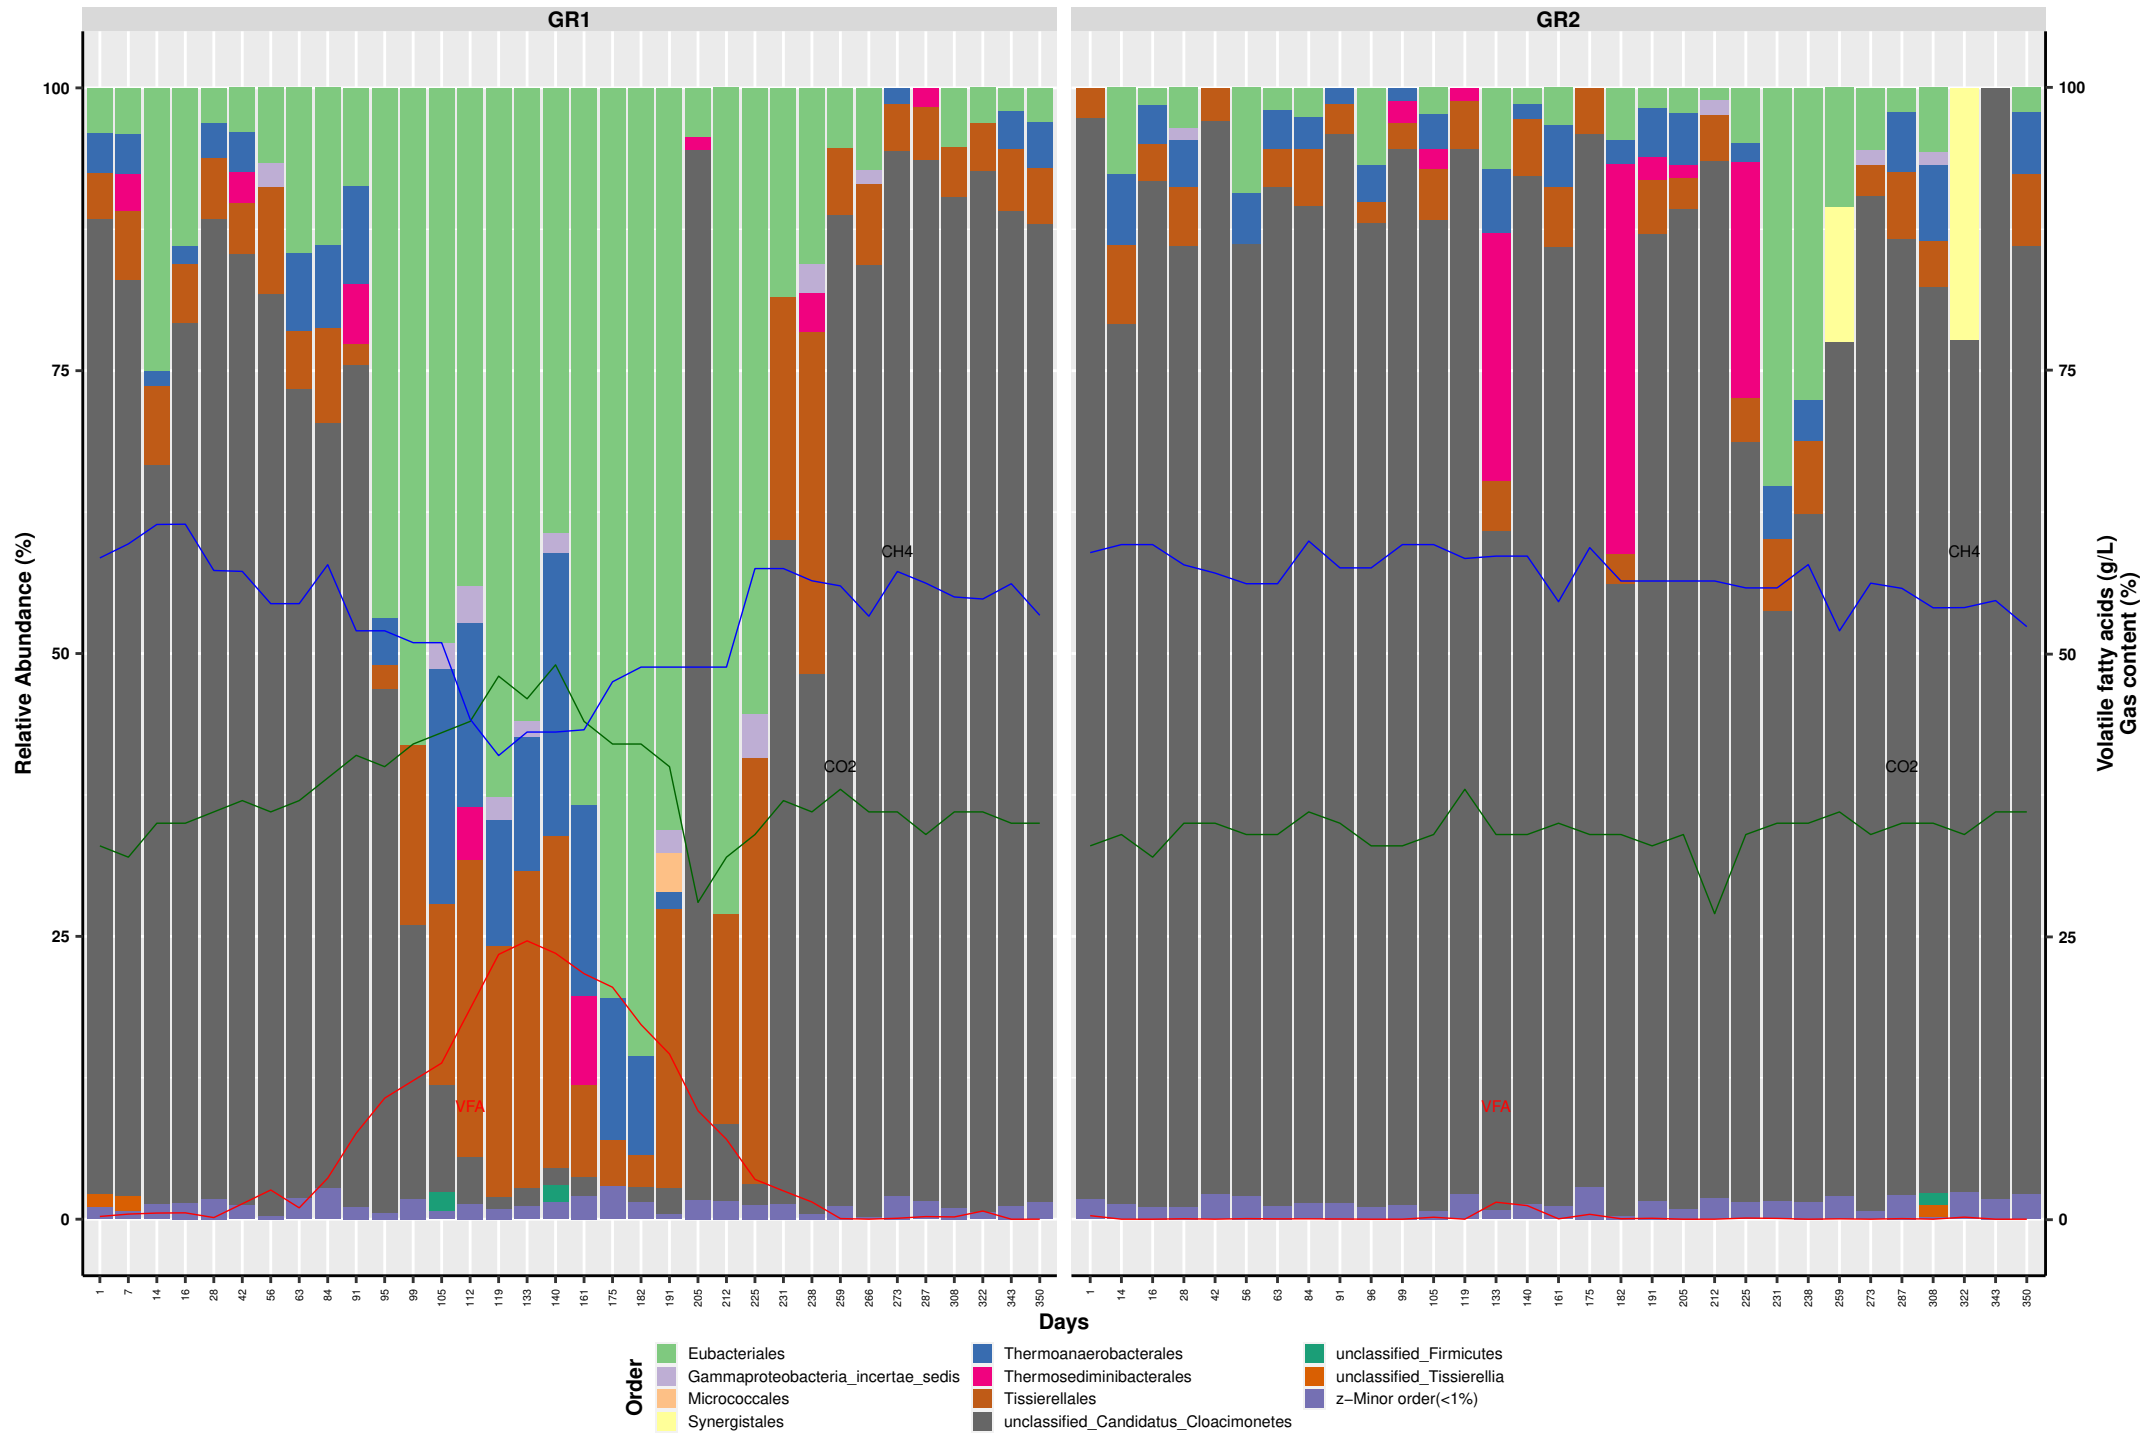

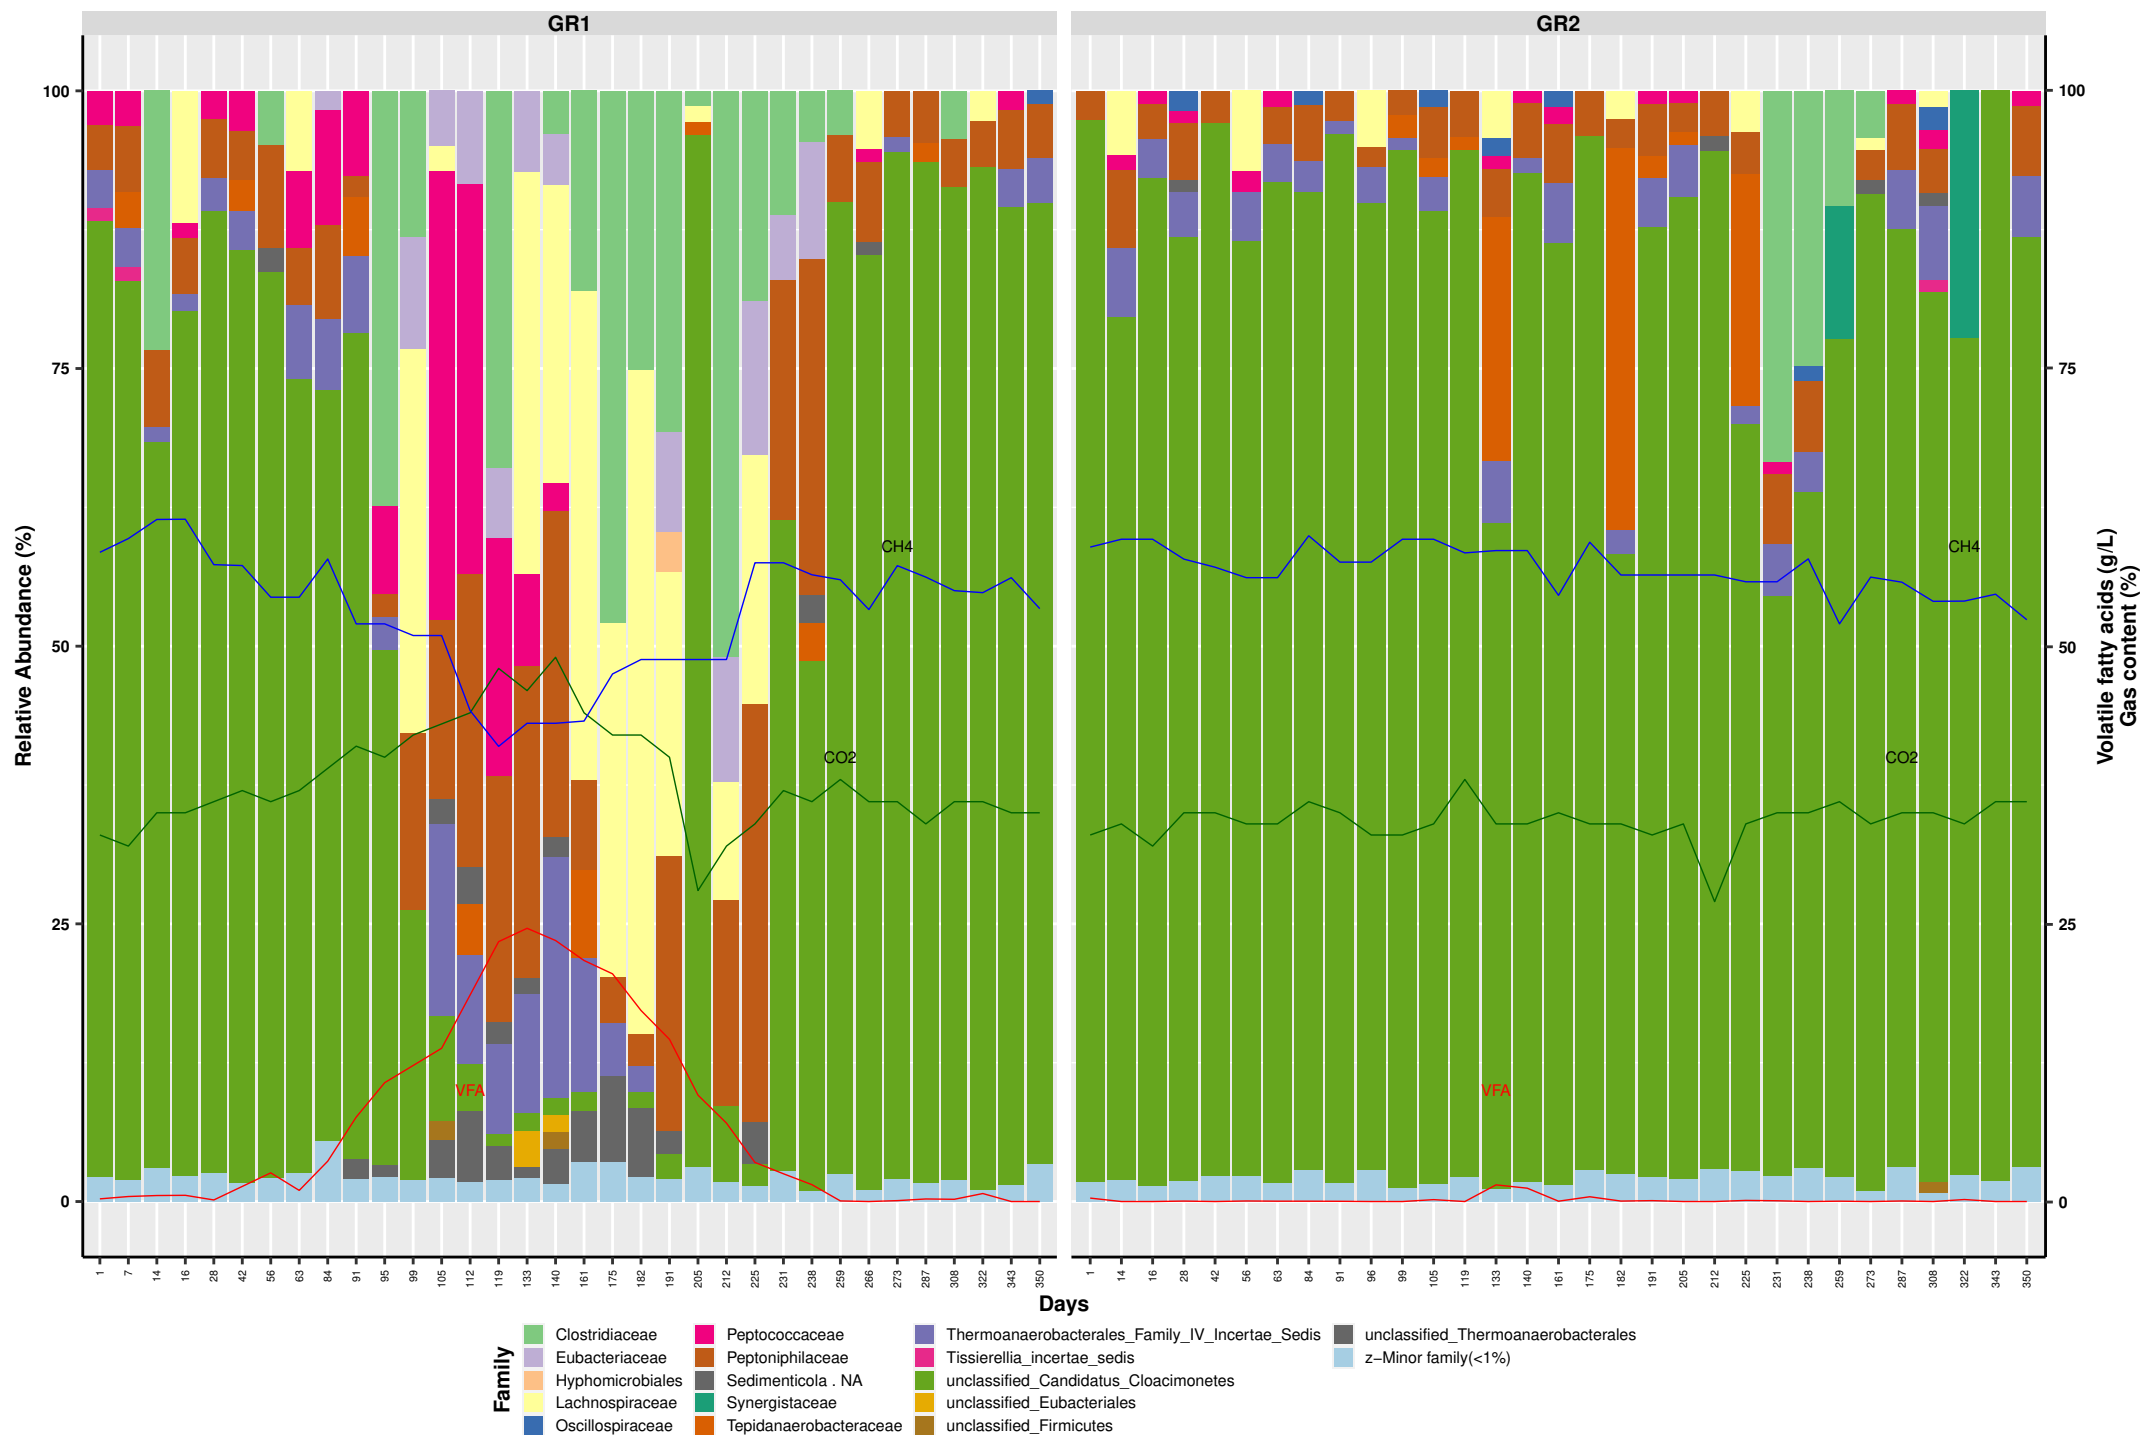

FTHFS-community: Genus Relative Abundance (> 1 %)

S2E

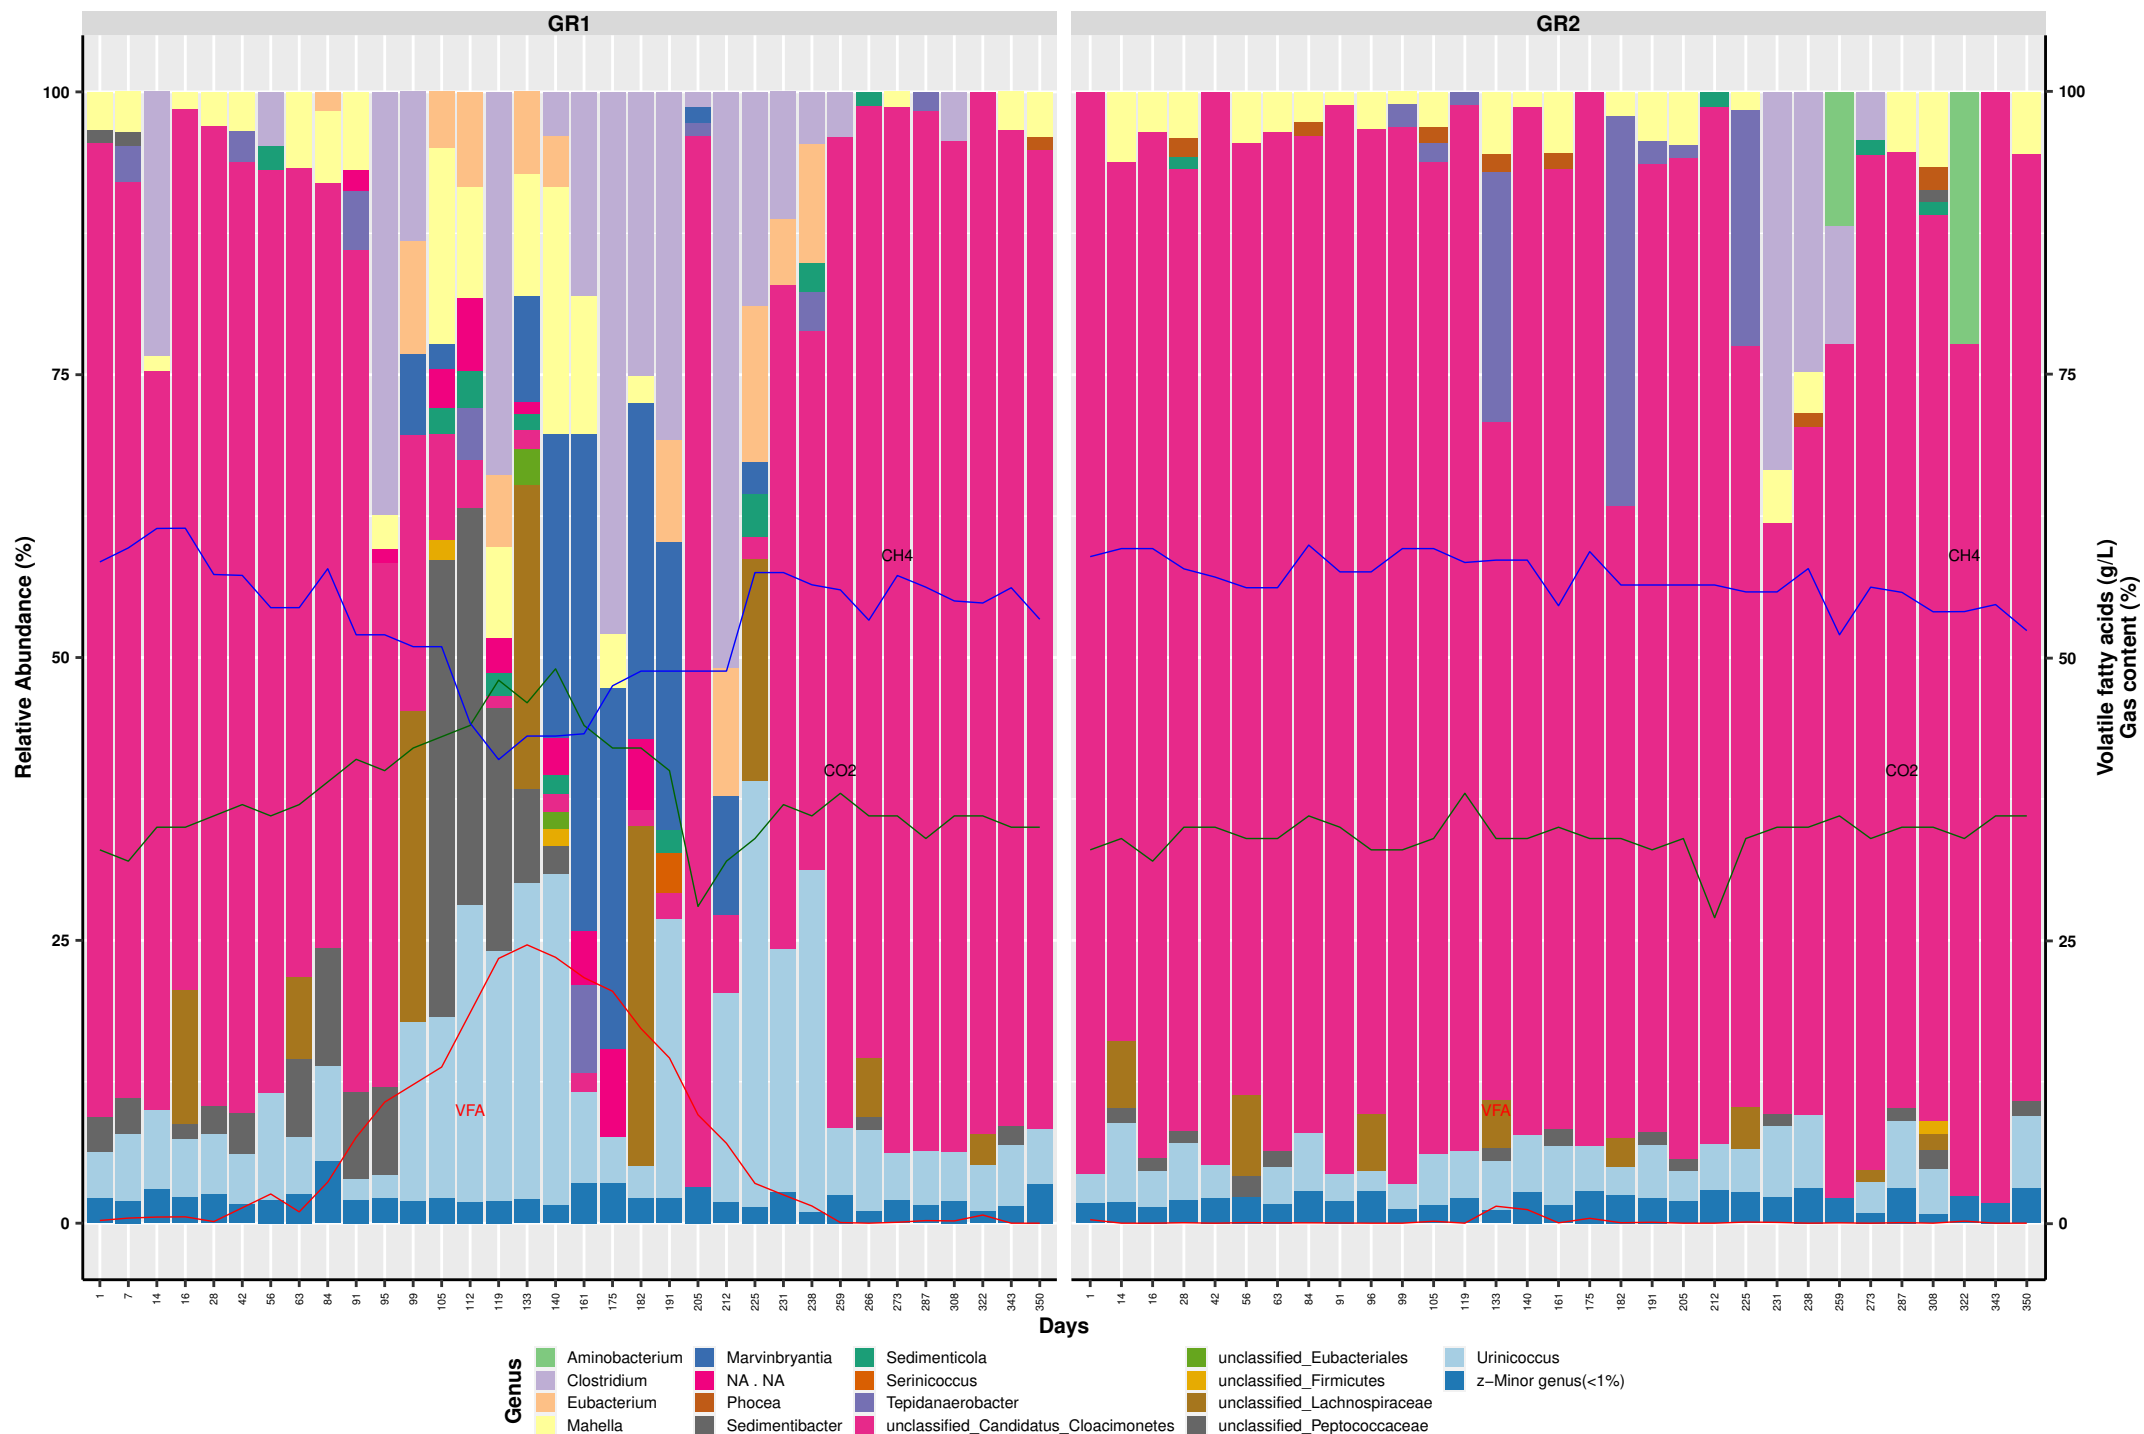

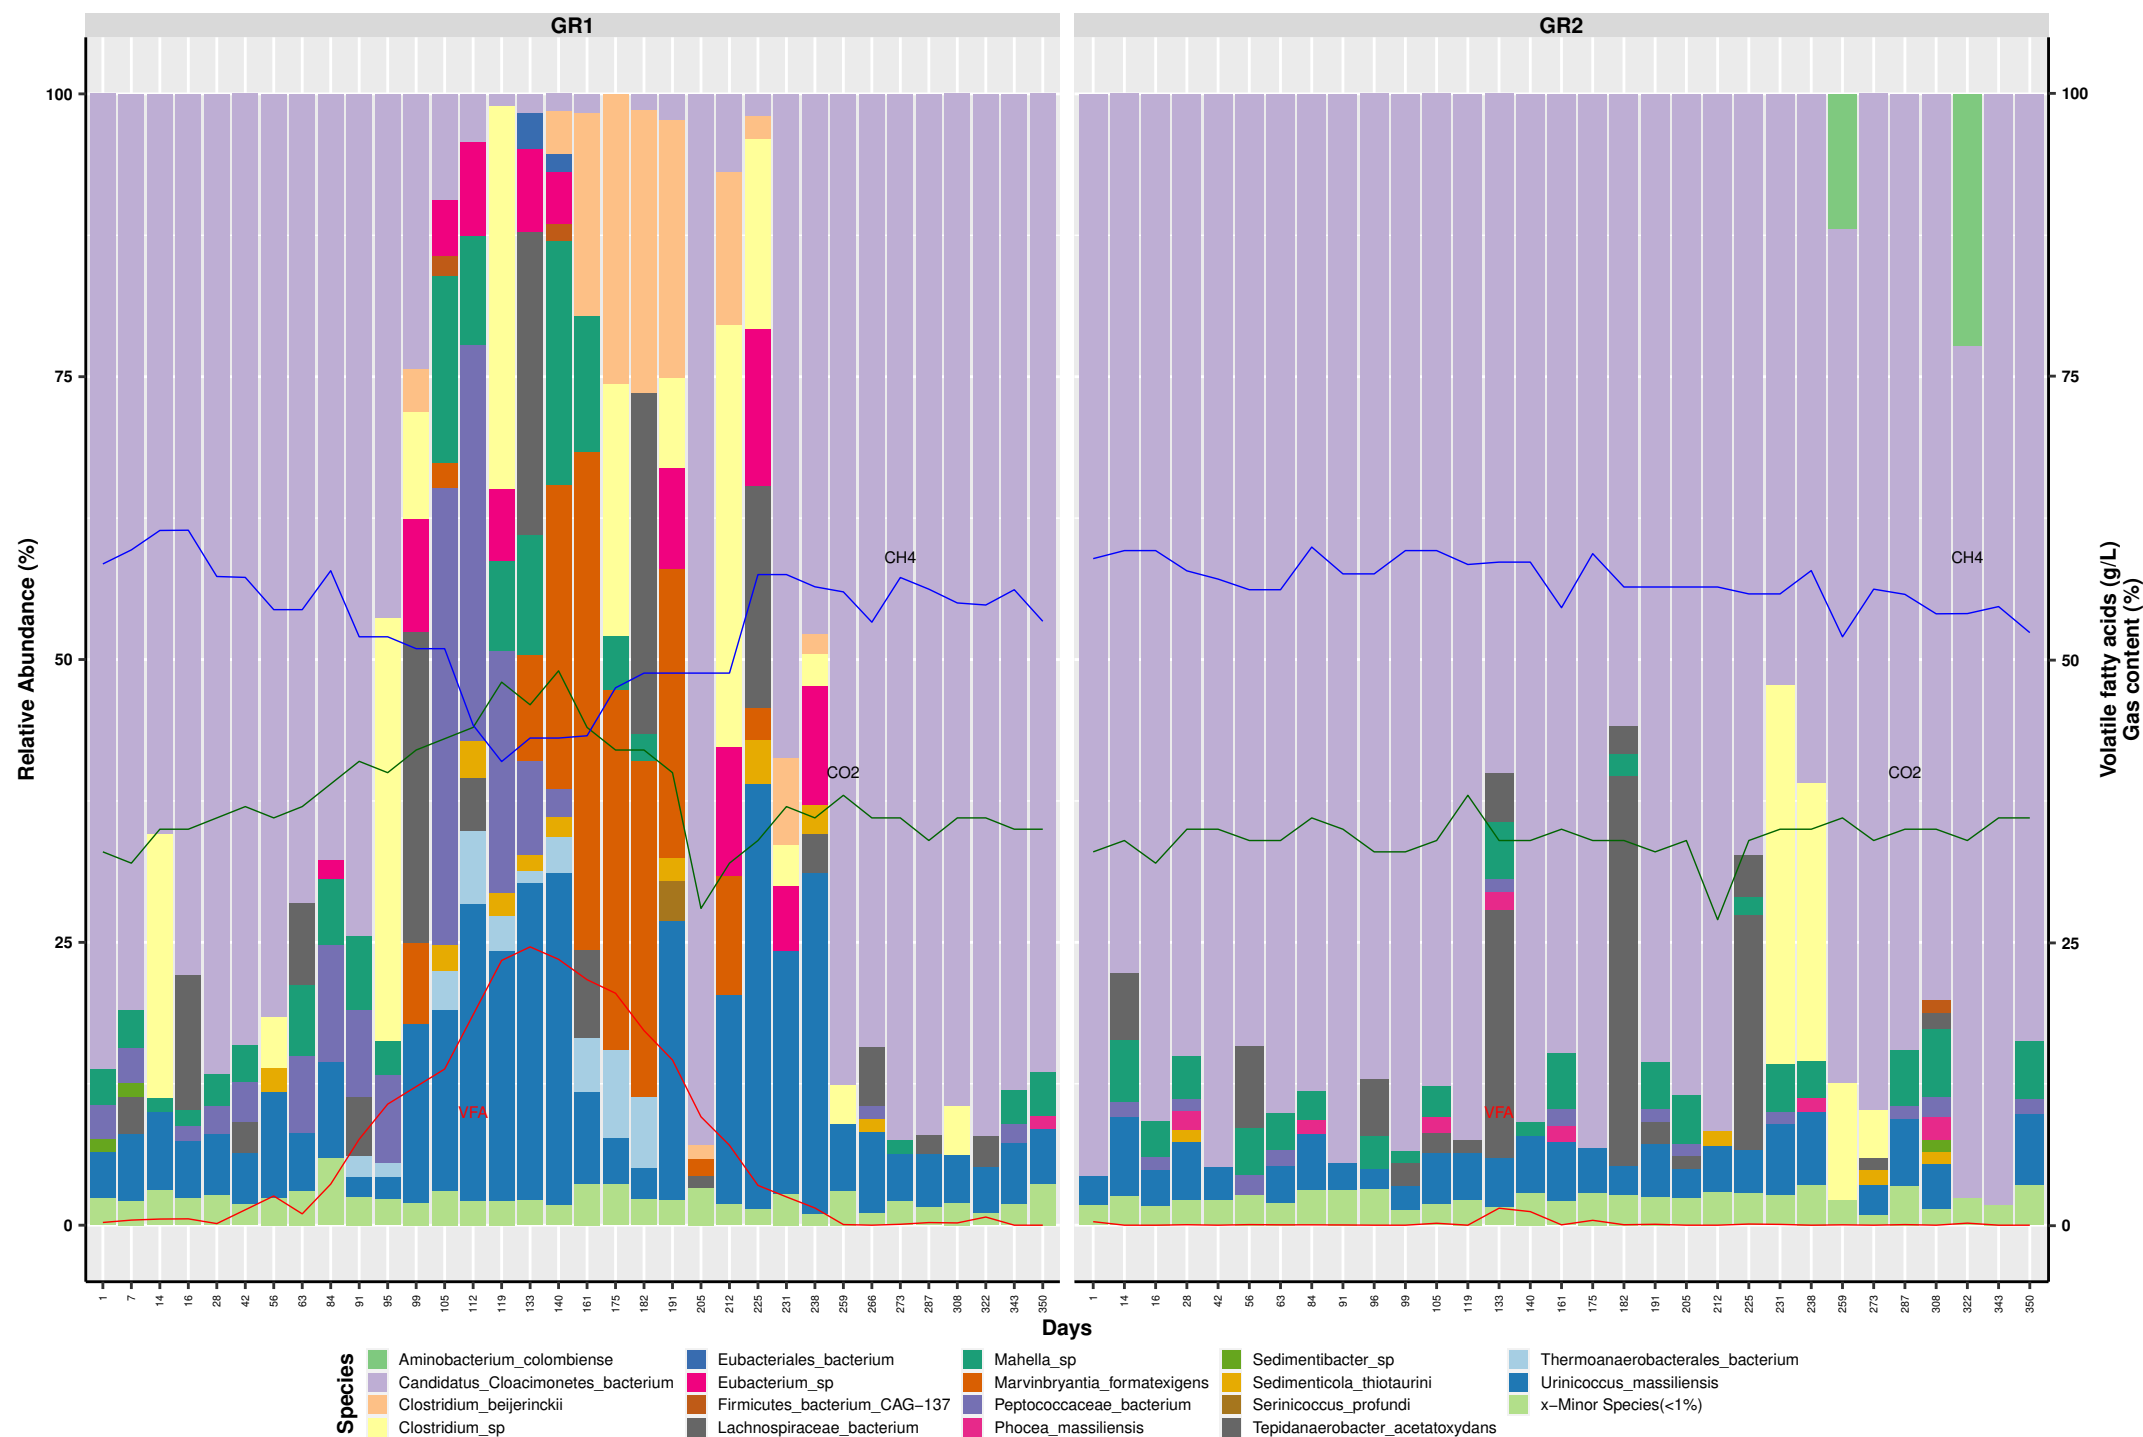

Supplement: baac041_supp.zip [file baac041_supp.zip]
